Article

# A forest biogeochemistry model intercomparison on the East Coast of the United States

Adam Erickson<sup>1\*</sup> , Nikolay Strigul<sup>1</sup> 

<sup>1</sup> Department of Mathematics and Statistics, Washington State University, 14204 NE Salmon Creek Avenue, Vancouver, WA 98686, USA; {adam.erickson, nick.strigul}@wsu.edu

\* Correspondence: adam.erickson@wsu.edu; Tel.: +1-360-546-9655

Version November 30, 2018 submitted to Journal Not Specified

**Abstract:** Recent advances in forest ecosystem modeling allow the simulation of a suite of dynamics from site- to landscape-scale. In order to scale models efficiently from trees to landscapes, different model reduction strategies are employed. Yet, the results of these strategies and the assumptions they entail are rarely compared. Here, we conducted a model intercomparison exercise using two such forest biogeochemistry models, PPA-SiBGC and LANDIS-II NECN. We simulated past-decade conditions at flux tower sites in Harvard Forest, MA, USA and Jones Ecological Research Center, GA, USA. We mined the wealth of field data available for both sites to perform model parameterization, validation, and intercomparison. We assessed model performance using the following time-series metrics: net ecosystem exchange, aboveground net primary production, aboveground biomass, C, and N, belowground biomass, C, and N, soil respiration, and, species total biomass and relative abundance. We also assessed static observations of soil organic C and N, and concluded with an assessment of general model usability, performance, and transferability. Despite substantial differences in design, both models achieved good accuracy across the range of metrics. While LANDIS-II NECN performed better for interannual NEE fluxes due to its basis in the Century model, the PPA-SiBGC model indicated better overall correspondence to observational data for both sites across the 11 temporal and 2 static metrics tested (HF-EMS  $\overline{R^2} = 0.73, +0.07, \overline{RMSE} = 4.84, -10.02$ ; JERC-RD  $\overline{R^2} = 0.76, +0.04, \overline{RMSE} = 2.69, -1.86$ ).

**Keywords:** Perfect Plasticity Approximation; SORTIE-PPA; LANDIS-II; forest ecosystem simulation; forest biogeochemistry model; forest landscape model; model intercomparison; Harvard Forest; Jones Ecological Research Center

## 1. Introduction

Forest models are thought to have begun 350 years ago in China with yield tables known as the Lung Ch'uan codes, invented by a women of the Kuo family in Suichuan county, Jiangxi [1]. It was not until the 20<sup>th</sup> century that the first complex mathematical models of forests emerged. Digital computers enabled researchers, for the first time, to explicitly model forest dynamics. Following the development of matrix models [2] and empirical growth-and-yield models such as Prognosis [3,4], a vast array of gap [5], forest landscape [6–10], and terrestrial biosphere models [11–13] have been developed. Models of forest ecosystems vary substantially in their representation of crown geometry and biogeochemical processes.

Representation of canopy geometry varies from implicit to a single 'big-leaf' and detailed three-dimensional crown and root geometry (e.g., modern gap models such as MAESPA [14] and LES [15]). Models of growth range from simple allometric equations (e.g., growth-and-yield models) to light-use efficiency models [16] and first-principles mechanistic models of photosynthesis [17]. Belowground process models similarly vary in structure, from simple stoichiometric relations to carbon

35 and nitrogen cycling with microbial dynamics to a fully mechanistic representation of energetic and  
36 biogeochemical processes based on thermodynamics. Current belowground models vary considerably  
37 in their process representation and accuracy, with much improvement left to be made [18]. Most  
38 belowground models in use globally rely on a variant of the classical Century model [19,20].

39 Model specialization and generalization ranges from pure research applications in narrowly  
40 defined areas (e.g., [14]) to simulating multiple loosely coupled landscape processes to simulating  
41 biogeochemical fluxes throughout the world's forests. A trade-off is thought to exist between realism,  
42 precision, and generality [21], with more detailed models requiring higher parameterization costs. Yet,  
43 little is known about the net effects of variation in the structure of these models on the precision and  
44 accuracy of their predictions across temporal and spatial scales. While such model intercomparisons  
45 are common within classes of models such as terrestrial biosphere models, they are seldom applied to  
46 gap or forest landscape models. Models operating at different scales are seldom compared within sites.  
47 Yet, much can be learned by comparing models that differ in assumptions and structure.

48 Existing forest model intercomparison projects, or MIPs, in Europe include the stand-level  
49 Intersectoral Impact MIP (ISIMIP) [22] and landscape-level Comparison of Forest Landscape Models  
50 (CoFoLaMo) [23], the latter conducted under the European Union Cooperation on Science and  
51 Technology (COST) Action FP1304 "Towards robust projections of European forests under climate  
52 change" (ProFoUnd). Previous efforts in the United States include the Throughfall Displacement  
53 Experiment (TDE) Ecosystem Model Intercomparison Project at Walker Branch Watershed in Oak  
54 Ridge, Tennessee [24]. Presently, no other forest model intercomparison project is evident for North  
55 America. There is a critical need to conduct ongoing forest biogeochemistry model comparisons in  
56 this and other regions of the world in order to establish the regional foundation for robust global C  
57 cycle projections. In this work, we aim to begin this process for North America with a comparison  
58 of the Perfect Plasticity Approximation with Simple Biogeochemistry (PPA-SiBGC) and Landscape  
59 Disturbance and Succession with Net Ecosystem Carbon and Nitrogen (LANDIS-II NECN) models,  
60 which provide contrasting model structures for representing stand dynamics.

61 Modern forest landscape models are the result of five key model development phases, listed in  
62 chronological order: (1) growth-and-yield models; (2) fire models; (3) gap models; (4) physiological  
63 models; (5) hybrid models combining design principles from each [5,25,26]. Terrestrial biosphere  
64 models similarly trace their roots back to early one-dimensional physiological models, with land  
65 surface models currently in their third generation and dynamic global vegetation models in their  
66 second generation [27]. This latest generation of models was intended to address the lack of  
67 explicit representation of vegetation dynamics - a critical source of model uncertainty in future  
68 climate scenarios [28]. This inspired the aforementioned forest ecosystem model intercomparisons  
69 as well as new terrestrial biosphere model designs based on gap models, bypassing the trade-offs of  
70 medium-resolution forest landscape models.

71 Collectively, these efforts yielded a number of new terrestrial biosphere models based on the  
72 classical gap model, including the Lund-Potsdam-Jena General Ecosystem Simulator (LPJ-GUESS)  
73 [29], the Ecosystem Demography model (ED/ED2) [30,31], and Land Model 3 with PPA (LM3-PPA)  
74 [32], based on the Perfect Plasticity Approximation (PPA) [33,34]. These models represent the current  
75 state-of-the-art in modeling vegetation dynamics globally. While individual-based global models have  
76 begun to merge, forest landscape models have remained in between, focused on spatial processes of  
77 fire, harvest, and biological disturbance. Yet, previous research has shown that such forest landscape  
78 models are often insensitive to landscape configuration and are therefore aspatial [35], counter to the  
79 main assumption and selling point of these models.

80 While most forest landscape and terrestrial biosphere models lack individual trees, the SAS [30]  
81 and PPA [33,36,37] model reduction strategies have demonstrated an ability to successfully up-scale  
82 gap dynamics to forest stands. Other up-scaling strategies exist as well. One recent forest landscape  
83 model participating in the CoFoLaMo intercomparison scales from individual trees to stands by  
84 pre-computing light tables [38]. Regardless of the model structure, it is clear that gap, forest landscape,

85 and terrestrial biosphere models are beginning to merge into new models of the terrestrial biosphere.  
86 This trend is also attributable to improvements in computational efficiency with new processor designs  
87 and cluster or cloud computing infrastructure. As few, if any, existing models are designed for highly  
88 parallel architectures (e.g., general-purpose graphics processing units, or GPGPUs), there remains  
89 much potential for future model efficiency gains.

90 In this forest biogeochemistry model intercomparison, we focus on two sites on the East Coast of  
91 the United States, Harvard Forest (HF), Massachusetts and Jones Ecological Research Center (JERC),  
92 Georgia. The two sites were selected for their representativeness of the United States Eastern Seaboard  
93 and for the availability of data needed to parameterize and validate the models. Harvard Forest is one  
94 of the most-studied forests in the world, with Google Scholar returning 12,700 results for the site. We  
95 focus on results for the Environmental Measurement Station (EMS) eddy covariance (EC) flux tower  
96 site within the Little Prospect Hill tract - the longest-running eddy covariance flux tower in the world.  
97 Previous research at the EMS EC flux tower site found unusually high rates of ecosystem respiration  
98 in winter and low rates in mid-to-late summer compared to other temperate forests [39]. While the  
99 mechanisms behind these observed patterns remains poorly understood, this observation is outside  
100 the scope of the presented research.

101 Between 1992 and 2004, the site acted as a net carbon sink, with a mean annual uptake rate  
102 of  $2.5 \text{ Mg C ha}^{-1} \text{ year}^{-1}$ . Aging dominated the site characteristics, with a 101-115  $\text{Mg C ha}^{-1}$  increase  
103 in biomass, comprised predominantly of growth of red oak (*Quercus rubra*). The year 1998 showed  
104 a sharp decline in net ecosystem exchange (NEE) and other metrics, recovering thereafter [40]. As  
105 Urbanski *et al.* [40] note of the Integrated Biosphere Simulator 2 (IBIS2) and similar models at the  
106 time, "the drivers of interannual and decadal changes in NEE are long-term increases in tree biomass,  
107 successional change in forest composition, and disturbance events, processes not well represented in  
108 current models." The two models used in the intercomparison study, a SORTIE-PPA [33,34] variant and  
109 LANDIS-II with NECN succession [41,42], are intended to directly address these model shortcomings.

110 While there have been fewer studies at Jones Ecological Research Center, Georgia, USA, Google  
111 Scholar returns 1,370 results for the site, reflecting its growing role in forest sciences research. Our  
112 study focuses on the Red Dirt (RD) EC flux tower site within the mesic sector, for which a handful of  
113 relevant studies exist. Two recent studies [43,44] indicate that the mesic sector of this subtropical pine  
114 savanna functions as a moderate carbon sink ( $\text{NEE} = -0.83 \text{ Mg C ha}^{-1} \text{ year}^{-1}$ ;  $-1.17 \text{ Mg C ha}^{-1} \text{ year}^{-1}$ ),  
115 reduced to near-neutral uptake during the 2011 drought ( $\text{NEE} = -0.17 \text{ Mg C ha}^{-1} \text{ year}^{-1}$ ), and is a  
116 carbon source when prescribed burning is taken into account. NEE typically recovered to pre-fire rates  
117 within 30-60 days. The mechanisms behind soil respiration rates here again appear to be complex,  
118 site-specific, and poorly understood [44].

119 Overall, existing research highlights the importance of fire and drought to carbon exchange in  
120 long-leaf pine (*Pinus palustris*) and oak (*Quercus spp.*) savanna systems [43-45] at JERC. This is in  
121 contrast to the secondary growth-dominated deciduous broadleaf characteristics of Harvard Forest.  
122 Species diversity at the EMS tower site is 350% greater than that of the JERC-RD site, with 14 species  
123 from a variety of genera compared to four species from only two genera, *Pinus* and *Quercus*.

124 In this work, we aim to establish a foundation for future forest biogeochemistry model  
125 intercomparisons. This includes open-source object-oriented software to facilitate model  
126 parameterization, validation, intercomparison, and simplified reproducibility of results. We perform  
127 the model intercomparison for two key research forests in the United States to assess the ability of each  
128 model to reproduce observed biogeochemistry pools and fluxes over time. We hypothesize that the  
129 inclusion of forest growth, compositional change, and mortality processes in both models will allow  
130 for accurate predictions of biomass and NEE dynamics, as suggested in previous research Urbanski  
131 *et al.* [40]. Accordingly, we compare both models to observations and to each other for a host of metrics  
132 related to biomass, C, N, and forest composition at the two research sites.

## 133 2. Materials and Methods

134 LANDIS-II NECN and PPA-SiBGC were parameterized for two forested sites in the eastern United  
135 States, Harvard Forest, Massachusetts and Jones Ecological Research Center, Georgia. At the HF site,  
136 we focus on Little Prospect Hill and the EMS EC flux tower (HF-EMS). At the JERC site, we focus on  
137 the mesic zone and RD EC flux tower (JERC-RD). Both sites provided local EC and meteorological  
138 measurements to conduct this study. Plots of EC flux and meteorological tower measurements for both  
139 sites are located in Appendix A; maps of both sites are located in Appendix B.

140 Both models were parameterized using data available for each site, including local (i.e., field  
141 measurements) and general information sources (e.g., species compendiums and other published  
142 sources). As these empirical or observational values were used to parameterize both models, further  
143 model calibration (i.e., parameter tuning) was not necessary. This is because tuning parameters away  
144 from measured values to improve model performance, or defining a separate set of tuning parameters,  
145 is known to produce model over-fitting (i.e., reduced generality) and thus false improvements in  
146 model accuracy through reduced parsimony [46]. We explicitly avoided this practice, as it is only  
147 appropriate when fitting empirical growth-and-yield models such as Prognosis, also known as the  
148 Forest Vegetation Simulator (FVS) [3,4]. All model parameters are provided in the Appendix C. We  
149 close the methodology section with descriptions of the metrics, models, and criteria used in the  
150 intercomparisons.

### 151 2.1. Model Descriptions

152 In the following sections, we provide a brief overview of the two forest ecosystem models used in  
153 this intercomparison study. For detailed information on each model, readers are encouraged to refer to  
154 the original publications.

#### 155 2.1.1. LANDIS-II NECN

156 The LANDIS-II model is an extension of the original LANDscape DIsturbance and Succession  
157 (LANDIS) model [47–49] into a modular software framework [41]. Specifically, LANDIS-II is a model  
158 core containing basic state information that interfaces or communicates with external user-developed  
159 models known as "extensions" using a combination of object-oriented and modular design. This design  
160 makes LANDIS-II a modeling framework rather than a model. The LANDIS family of models, which  
161 also includes LANDIS PRO [50] and Fin-LANDIS [51,52], are stochastic hybrid models [25] based on  
162 the vital attributes/fuzzy systems approach of the LANDSIM model genre [53]. Perhaps unknowingly,  
163 this genre borrows heavily from cellular automata [54] and thus Markov Chains by applying simple  
164 heuristic rule-based systems, in the form of vital attributes, across two-dimensional grids.

165 Models of the LANDSIM genre focus on landscape-scale processes and assume game-theoretic  
166 vital attribute controls over successional trajectories following disturbance [55]. The LANDSIM model  
167 genre is thus a reasonable match for the classical forest fire model [56], given its local two-dimensional  
168 cellular basis. In contrast to the original LANDIS model, LANDIS-II is implemented in Microsoft  
169 C# rather than ISO C++98 [57], simplifying model development in exchange for a proprietary  
170 single-vendor software stack [41].

171 The latest version of LANDIS-II (v7) supports Linux through use of the Microsoft .NET Core  
172 developer platform. The modular design of LANDIS-II is intended to simplify the authorship and  
173 interaction of user-provided libraries for succession and disturbance. The centralized model core  
174 stores basic landscape and species state information and acts as an interface between succession  
175 and disturbance models. While there have been numerous forest landscape models over the years  
176 [6–10], the LANDIS family of models has enjoyed notable longevity and is currently united under the  
177 LANDIS-II Foundation. Part of its longevity is attributable to the prioritization of model functionality  
178 over realism in order to appeal to application-minded managers seeking a broad array of functionality.

179 The Net Ecosystem Carbon and Nitrogen (NECN) model [42] is a simplified variant of the classical  
 180 Century model [19,20]. The original ten soil layers in Century have been replaced by a single soil layer,  
 181 with functions for growth and decay borrowed directly from Century v4.5. The NECN succession  
 182 model Figure 1 is thus a process-based model that simulates C and N dynamics along the plant-soil  
 183 continuum at a native monthly timestep.

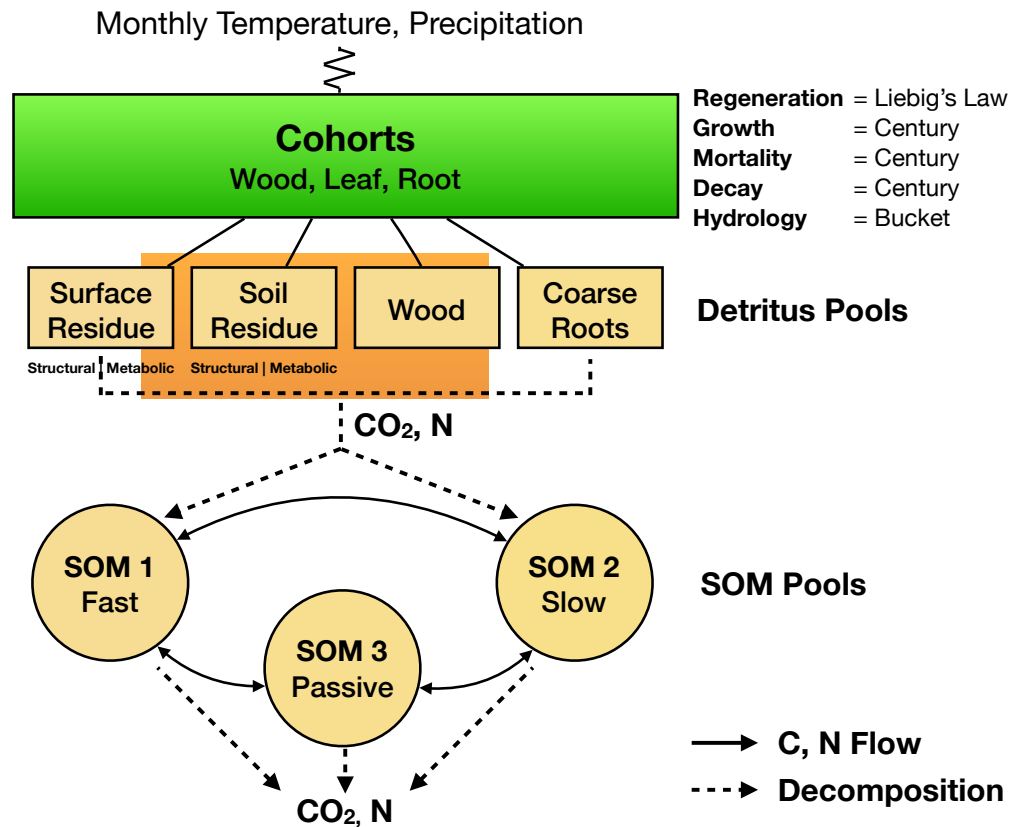

Figure 1. LANDIS-II NECN model structure

184 Atmospheric effects are included through monthly climate (i.e., temperature maxima, minima,  
 185 means, and standard deviations, and precipitation means and standard deviations). Explicit geometric  
 186 representation of tree canopies is forgone in favor of bounded statistical growth models based  
 187 theoretically on Liebig's Law of the Minimum. Functions for growth, mortality, and decay are adopted  
 188 from Century [19] while hydrology is based on the simple bucket model [58]. The regeneration  
 189 function is the only new process in NECN and is also based on Liebig's Law. For a detailed description of  
 190 the NECN model, readers may refer to the original model publication [42]. Parameterization of the  
 191 LANDIS-II model for both sites was based on updating parameters used in recent [59–62] and ongoing  
 192 (Flanagan et al., *in review*) work.

### 193 2.1.2. PPA-SiBGC

194 The PPA-SiBGC model belongs to the SORTIE-PPA family of models [33,36] within the SAS-PPA  
 195 model genre, based on a simple and analytically tractable approximation of the classical SORTIE  
 196 gap model [63,64]. The Perfect Plasticity Approximation, or PPA [33,34], was derived from the dual  
 197 assumptions of perfect crown plasticity (e.g., space-filling) and phototropism (e.g., stem-leaning), both  
 198 of which were supported in empirical and modeling studies [36]. The discovery of the PPA was rooted  
 199 in extensive observational and *in silico* research [33]. The PPA model was designed to overcome the



200 most computationally challenging aspects of gap models in order to facilitate model scaling from the  
 201 landscape to global scale.

202 The PPA and its predecessor, the size-and-age structured (SAS) equations [30,65], are popular  
 203 model reduction techniques employed in current state-of-the-art terrestrial biosphere models [13]. The  
 204 PPA model can be thought of metaphorically as Navier-Stokes equations of forest dynamics, capable of  
 205 modeling individual tree population dynamics with a one-dimensional von Foerster partial differential  
 206 equation [33]. The simple mathematical foundation of the PPA model is provided in Equation 1.

$$1 = \int_{z^*}^{\infty} \sum_{j=1}^k N_j(z) A_j(z^*, z) dz \quad (1)$$

207 where  $k$  is the number of species,  $j$  is the species index,  $N_j(z)$  is the density of species  $j$  at height  $z$ ,  
 208  $A_j(a^*, z)$  is the projected crown area of species  $j$  at height  $z$ , and  $dz$  is the derivative of height. In other  
 209 words, we discard the spatial location of individual trees and calculate the height at which the integral  
 210 of tree crown area is equal to the ground area of the stand. This height is known as the theoretical  $z^*$   
 211 height, which segments trees into overstory and understory classes [33].

212 The segmentation of the forest canopy into understory and overstory layers allows for separate  
 213 coefficients or functions for growth, mortality, and fecundity to be applied across strata, whose first  
 214 moment accurately approximates the dynamics of individual-based forest models. Recent studies have  
 215 shown that the PPA model faithfully reduces the dynamics of the more recent neighborhood dynamics  
 216 (ND) SORTIE-ND gap model [66] and is capable of accurately capturing forest dynamics [67,68].

217 In this work, we applied a simple biogeochemistry variant of the SORTIE-PPA model, PPA-SiBGC  
 218 [Erickson and Strigul, *In Review*] Figure 2.

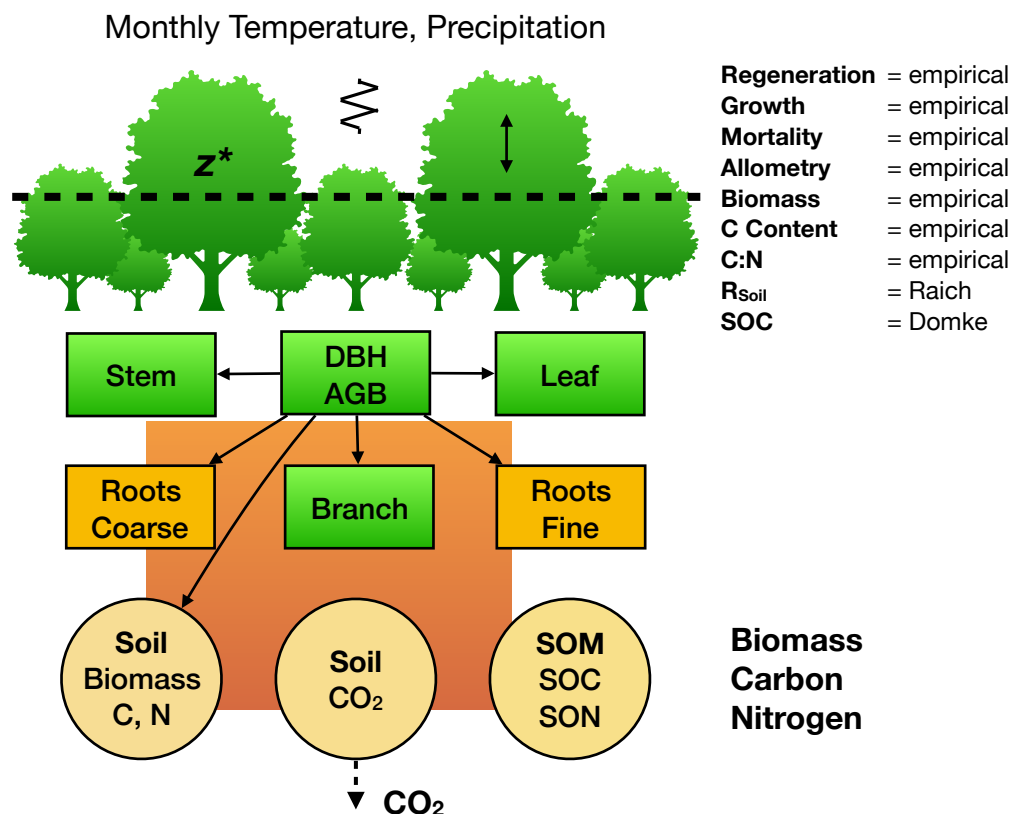

Figure 2. PPA-SiBGC model structure; Raich *et al.* [69]; Domke *et al.* [70]

219 Empirical observations were relied upon for the C and N content of tree species compartments.  
220 Stoichiometric relations were used to estimate N from C, based on empirical measurements provided  
221 for both sites. All values were calculated directly from observations. Previously published equations  
222 [71] and parameters [72] were used to model crown allometry. Together with inventory data, general  
223 biomass equations were used to estimated dry weight mass (*kg*) for tree stems, branches, leaves, and,  
224 fine and coarse roots [73]. Carbon content is assumed to be 50% of dry mass, supported by data.  
225 Monthly soil respiration is modeled using the approach of Raich *et al.* [69], while soil organic C is  
226 modeled using the simple generalized approach of Domke *et al.* [70]. Species- and stratum-specific  
227 parameters for growth, mortality, and fecundity were calculated from observational data available for  
228 both sites.

## 229 2.2. Site Descriptions

230 In the following sections, we describe the two forested sites on the East Coast of the United States:  
231 HF-EMS and the JERC-RD. A critical factor in the selection of the sites was the availability of eddy  
232 covariance flux tower data needed to validate NEE in the models.

### 233 2.2.1. HF-EMS

234 The HF-EMS EC flux tower is located within the Little Prospect Hill tract of Harvard Forest  
235 (42.538°N, 72.171°W, 340 m elevation) in Petersham, Massachusetts, approximately 100 km from the  
236 city of Boston [40]. The tower has been recording NEE, heat, and meteorological measurements since  
237 1989, with continuous measurements since 1991, making it the longest-running eddy covariance  
238 measurement system in the world. The site is currently predominantly deciduous broadleaf  
239 second-growth forests approximately 75-95 years in age, based on previous estimates [74]. Soils  
240 at Harvard Forest originate from sandy loam glacial till and are reported to be mildly acidic [40].

241 The site is dominated by red oak (*Quercus rubra*) and red maple (*Acer rubrum*) stands, with  
242 sporadic stands of Eastern hemlock (*Tsuga canadensis*), white pine (*Pinus strobus*), and red pine (*Pinus*  
243 *resinosa*). When the site was established, it contained 100 Mg C ha<sup>-1</sup> in live aboveground woody  
244 biomass [74]. As noted by Urbanski *et al.* [40], approximately 33% of red oak stands were established  
245 prior to 1895, 33% prior to 1930, and 33% before 1940. A relatively hilly and undisturbed forest (since  
246 the 1930s) extends continuously for several km<sup>2</sup> around the tower. In 2000, harvest operations removed  
247 22.5 Mg C ha<sup>-1</sup> of live aboveground woody biomass about 300 m S-SE from the tower, with little  
248 known effect on the flux tower measurements. The 40 biometric plots were designated via stratified  
249 random sampling within eight 500 m transects Urbanski *et al.* [40]. The HF-EMS tower site currently  
250 contains 34 biometric plots at 10 m radius each, covering 10,681 m<sup>2</sup>, or approximately one hectare, in  
251 area. Summary statistics for the EMS tower site are provided in Table 1.

**Table 1.** HF-EMS site forest inventory summary; DBH in cm and aboveground biomass ( $B_{AG}$ ) in kg

| Statistic | N     | Mean    | St. Dev. | Min   | Pctl(25) | Pctl(75) | Max      |
|-----------|-------|---------|----------|-------|----------|----------|----------|
| Year      | 7,234 | 2006.93 | 3.155    | 2002  | 2004     | 2010     | 2012     |
| DBH       | 7,234 | 24.79   | 11.63    | 9.60  | 15.53    | 32.37    | 72.40    |
| $B_{AG}$  | 7,234 | 385.90  | 507.07   | 22.50 | 88.82    | 470.28   | 4,216.27 |

252 A table of observed species abundances for the 2002-2012 period are provided in Table 2.

**Table 2.** HF-EMS site species abundance

| Species | Count |
|---------|-------|
| ACPE    | 6     |
| ACRU    | 2720  |
| BEAL    | 400   |
| BELE    | 131   |
| BEPO    | 64    |
| FAGR    | 152   |
| FRAM    | 143   |
| PIGL    | 251   |
| PIRE    | 342   |
| PIST    | 334   |
| PRSE    | 150   |
| QURU    | 1366  |
| QUVE    | 135   |
| TSCA    | 1012  |

253 Data were collected here for a range of studies, as evidenced by the Harvard Forest Data Archive.  
 254 Datasets used in model validation include HF001-04, HF004-02, HF069-09, HF278-04, HF069-06,  
 255 HF015-05, HF006-01, and HF069-13. These include weather station and forest inventory time-series,  
 256 eddy covariance flux tower measurements, soil respiration, soil organic matter, and studies on C:N  
 257 stoichiometry. Standard measurement techniques were used for each. For both sites, local tree species,  
 258 age, depth-at-breast-height (DBH), biomass, soil, and meteorological data were primarily used to  
 259 parameterize the models.

#### 260 2.2.2. JERC-RD

261 Jones Ecological Research Center at Ichauway is located near Newton, Georgia, USA (31°N,  
 262 84°W, 25-200 m elevation). The site falls within the East Gulf Coastal Plain and consists of flat to  
 263 rolling land sloping to the southwest. The region is characterized by a humid subtropical climate  
 264 with temperatures ranging from 5-34 °C and precipitation averaging 132 cm year<sup>-1</sup>. The overall site is  
 265 12,000 ha in area, 7,500 ha of which are forested [75]. The site also exists within a tributary drainage  
 266 basin that eventually empties into the Flint River. Soils here are underlain by karst Ocala limestone  
 267 and mostly Typic Quartzipsamments, with sporadic Grossarenic and Aquic Arenic Paleudults [76].  
 268 Soils here often lack well-developed organic horizons [75–77].

269 Forests here are mostly second-growth, approximately 65-95 years in age. Long-leaf pine (*Pinus*  
 270 *palustris*) dominates the overstory, while the understory is comprised primarily of wiregrass (*Aristida*  
 271 *stricta*) and secondarily of shrubs, legumes, forbs, immature hardwoods, and regenerating long-leaf  
 272 pine forests [78]. Prescribed fire is a regular component of management here, with stands often burned  
 273 at regular 1-5 year intervals [75]. This has promoted wiregrass and legumes in the understory,  
 274 while reducing the number of hardwoods [75]. The RD EC flux tower is contained within the  
 275 mesic/intermediate sector. This site consists of only four primary tree species from two genera:  
 276 long-leaf pine (*Pinus palustris*), water oak (*Quercus nigra*), southern live oak (*Quercus virginiana*), and  
 277 bluejack oak (*Quercus incana*). Measurements for the RD tower are available for the 2008-2013 time  
 278 period. Summary statistics for the RD tower site are provided in Table 3.

**Table 3.** JERC-RD site forest inventory summary; DBH in cm and aboveground biomass ( $B_{AG}$ ) in kg

| Statistic | N     | Mean    | St. Dev. | Min   | Pctl(25) | Pctl(75) | Max      |
|-----------|-------|---------|----------|-------|----------|----------|----------|
| Year      | 1,012 | 2011.01 | 1.42     | 2009  | 2010     | 2012     | 2013     |
| DBH       | 1,012 | 31.10   | 12.73    | 10.70 | 18.96    | 42.25    | 62.75    |
| $B_{AG}$  | 1,012 | 707.28  | 564.65   | 3.91  | 177.27   | 1,179.59 | 2,708.08 |



279 A table of observed species abundances for the 2009-2013 period are provided in [Table 4](#).

**Table 4.** JERC-RD site species abundance

| Species | Count |
|---------|-------|
| PIPA    | 967   |
| QUIN    | 5     |
| QUNI    | 10    |
| QUVI    | 30    |

280 Datasets used in model validation at JERC-RD include JC010-02, JC010-01, JC003-04, JC004-01,  
281 JC003-07, and JC011-01. These include weather station and eddy covariance flux tower measurements,  
282 forest inventory data, soil respiration, soil organic matter, and studies on C:N stoichiometry. Standard  
283 measurement techniques were also used for each of these.

### 284 2.3. Site Data

285 To conduct this model intercomparison exercise at HF-EMS, we leveraged the large amount of  
286 data openly available to the public through the Harvard Forest Data Archive:

287 <http://harvardforest.fas.harvard.edu/harvard-forest-data-archive>

288 Jones Ecological Research Center has hosted multiple research efforts over the years, collectively  
289 resulting in the collection of a large data library. However, JERC-RD site data are not made openly  
290 available to the public and are thus only available by request. One may find contact information  
291 located within their website:

292 <http://www.jonesctr.org>

### 293 2.4. Scales, Metrics, and Units

294 The selection of simulation years was based on the availability of EC flux tower data used in  
295 model validation. Thus, we simulated the HF-EMS site for the years 2002-2012 and the JERC-RD site  
296 for the years 2009-2013. For both sites and models, we initialized the model state in the first year of  
297 simulations using field observations. The PPA-SiBGC model used an annual timestep while LANDIS-II  
298 NECN used a monthly timestep internally. Both models may be set to other timesteps if desired.

299 The areal extent of the single-site model intercomparisons were designed to correspond to  
300 available field measurements. At both sites, tree inventories were conducted in 10,000 m<sup>2</sup>, or  
301 one-hectare, areas. All target metrics were converted to an annual areal basis to ease interpretation,  
302 comparison, and transferability of results. Importantly, an areal conversion will allow comparison to  
303 other sites around the world. While flux tower measurements for both sites were already provided  
304 on an areal (m<sup>-2</sup>) basis, many other variables were converted to harmonize metrics between models  
305 and study sites. For example, moles CO<sub>2</sub> measurements were converted to moles C through  
306 well-described molecular weights, all other measures of mass were converted to kg, and all areal and  
307 flux measurements were harmonized to m<sup>-2</sup>. A table of metrics and units used in the intercomparison  
308 of LANDIS-II and PPA-SiBGC is provided in [Table 5](#).

**Table 5.** Model intercomparison abbreviations, metrics, and units

| Abbreviation | Metric                             | Units                         |
|--------------|------------------------------------|-------------------------------|
| NEE          | Net ecosystem exchange             | $kg\ C\ m^{-2}\ year^{-1}$    |
| $B_{AG}$     | Aboveground biomass                | $kg\ mass\ m^{-2}$            |
| $C_{AG}$     | Aboveground C                      | $kg\ C\ m^{-2}$               |
| $N_{AG}$     | Aboveground N                      | $kg\ N\ m^{-2}$               |
| $B_{BG}$     | Belowground biomass                | $kg\ mass\ m^{-2}$            |
| $C_{BG}$     | Belowground C                      | $kg\ C\ m^{-2}$               |
| $N_{BG}$     | Belowground N                      | $kg\ N\ m^{-2}$               |
| $C_{SO}$     | Soil organic C                     | $kg\ C\ m^{-2}$               |
| $N_{SO}$     | Soil organic N                     | $kg\ N\ m^{-2}$               |
| $r_{soil}$   | Soil respiration C                 | $kg\ C\ m^{-2}\ year^{-1}$    |
| ANPP         | Aboveground net primary production | $kg\ mass\ m^{-2}\ year^{-1}$ |
| $B_{Sp}$     | Species aboveground biomass        | $kg\ mass\ m^{-2}$            |
| $n_{Sp}$     | Species relative abundance         | %                             |

309 In the subsequent section, we describe the model intercomparison methodology.

### 310 2.5. Model Intercomparison

311 Intercomparison of the PPA-SiBGC and LANDIS-II models at the HF-EMS and JERC-RD EC  
 312 flux tower sites was conducted using a collection of object-oriented functional programming scripts  
 313 written in the R language for statistical computing [79]. These scripts were designed to simplify model  
 314 configuration, parameterization, operation, calibration/validation, plotting, and error calculation. The  
 315 scripts and our parameters are available on GitHub ([https://github.com/adam-erickson/ecosystem-  
 316 model-comparison](https://github.com/adam-erickson/ecosystem-model-comparison)), making our results fully and efficiently reproducible. The R scripts are also  
 317 designed to automatically load and parse the results from previous model simulations, in order to  
 318 avoid reproducibility issues stemming from model stochasticity. We use standard regression metrics  
 319 applied to the time-series of observation and simulation data to assess model fitness. The metrics  
 320 used include the coefficient of determination ( $R^2$ ), root mean squared error (RMSE), mean absolute  
 321 error (MAE), and mean error (ME) or bias, calculated using simulated and observed values. Our  
 322 implementation of  $R^2$  follows the Bravais-Pearson interpretation as the squared correlation coefficient  
 323 between observed and predicted values [80]. This implementation is provided in Equation 2.

$$R^2 = r^2 = \left( \frac{\sum_{i=1}^n (y_i - \bar{y})(\hat{y}_i - \bar{\hat{y}})}{\sqrt{\sum_{i=1}^n (y_i - \bar{y})^2 (\hat{y}_i - \bar{\hat{y}})^2}} \right)^2 \quad (2)$$

324 where  $n$  is the sample size,  $y_i$  is the  $i$ th observed value,  $\hat{y}_i$  is the  $i$ th predicted value,  $\bar{y}$  is the mean  
 325 observed value, and  $\bar{\hat{y}}$  is the mean predicted value. The calculation of RMSE follows the standard  
 326 formulation, as shown in Equation 3.

$$RMSE = \sqrt{\frac{1}{n} \sum_{t=1}^n e_t^2} \quad (3)$$

327 where  $n$  is the sample size and  $e_t$  is the error for the  $t$ th value, or the difference between observed  
 328 and predicted values. The calculation of MAE is similarly unexceptional, per Equation 4.

$$MAE = \frac{1}{n} \sum_{t=1}^n |e_t| \quad (4)$$

329 where again  $n$  is the sample size and  $e_t$  is the error for the  $t$ th value. Our calculation of mean  
 330 error (ME) or bias is the same as MAE, but without taking the absolute value.

331

332 While Nash-Sutcliffe efficiency (NSE) is often used in a simulation model context, we selected  
333 the Bravais-Pearson interpretation of  $R^2$  over NSE to simplify the interpretation of results. The NSE  
334 metric replaces  $1 - (SS_{\text{predictions}} / SS_{\text{observations}})$  with  $(SS_{\text{observations}} - SS_{\text{predictions}}) / SS_{\text{observations}}$ , where  
335  $SS$  is the sum of squares. Thus, NSE is analogous to the standard  $R^2$  coefficient of determination used  
336 in regression analysis [81]. The implementation of  $R^2$  that we selected is important to note, as its  
337 results are purely correlative and quantify only dispersion, ranging in value between 0 and 1. This has  
338 some desirable properties in that no negative or large values are produced, and that it is insensitive to  
339 differences in scale. Regardless of the correlation metric used, complementary metrics are needed to  
340 quantify the direction (i.e., bias) and/or magnitude of error. We rely on RMSE and MAE to provide  
341 information on error or residual magnitude, and ME to provide information on bias. We utilize a  
342 visual analysis to assess error directionality over time, as this can be poorly characterized by a single  
343 coefficient, masking periodicity.

344 We compute  $R^2$ , RMSE, MAE, and ME for time-series of the metrics described in Table 5 on  
345 page 10. These include NEE, above- and below-ground biomass, C, and N, soil organic C and N, soil  
346 respiration ( $r_{\text{soil}}$ ), aboveground net primary production (ANPP), and, species aboveground biomass  
347 and relative abundance. All of these metrics are pools with the exception of NEE,  $r_{\text{soil}}$ , and ANPP  
348 fluxes. Finally, we diagnose the ability of both models to meet a range of logistical criteria related to  
349 deployment: *model usability, performance, and transferability*. Model usability is assessed per four criteria:

- 350 1. Ease of installation
- 351 2. Ease of parameterization
- 352 3. Ease of program operation
- 353 4. Ease of parsing outputs

354 Model software performance is assessed per a single metric: the speed of program execution  
355 for each site for the predefined simulation duration. The durations are 11 years and 5 years for the  
356 HF-EMS and JERC-RD EC flux tower sites, respectively. Simulation results are output at annual  
357 temporal resolution, the standard resolution for both models; while NECN operates on a monthly  
358 timestep, most other modules of LANDIS-II are annual. Finally, model transferability is assessed per  
359 the following five criteria:

- 360 1. Model generalizability
- 361 2. Availability of parameterization data
- 362 3. Size of the program
- 363 4. Cross-platform support
- 364 5. Ease of training new users

365 Each of these logistical criteria are compared in a qualitative analysis, with the exception of  
366 software performance.

### 367 3. Results and Discussion

368 Both PPA-SiBGC and LANDIS-II NECN showed strong performance for pools at the two model  
369 intercomparison sites, frequently achieving  $R^2$  values approaching unity. Yet, both models showed  
370 weak performance for fluxes. The models failed to accurately predict ANPP, while PPA-SiBGC showed  
371 stronger  $r_{\text{soil}}$  performance and LANDIS-II NECN showed stronger NEE performance. The  $R^2$  values  
372 for both models and sites are visualized in Figure 3.

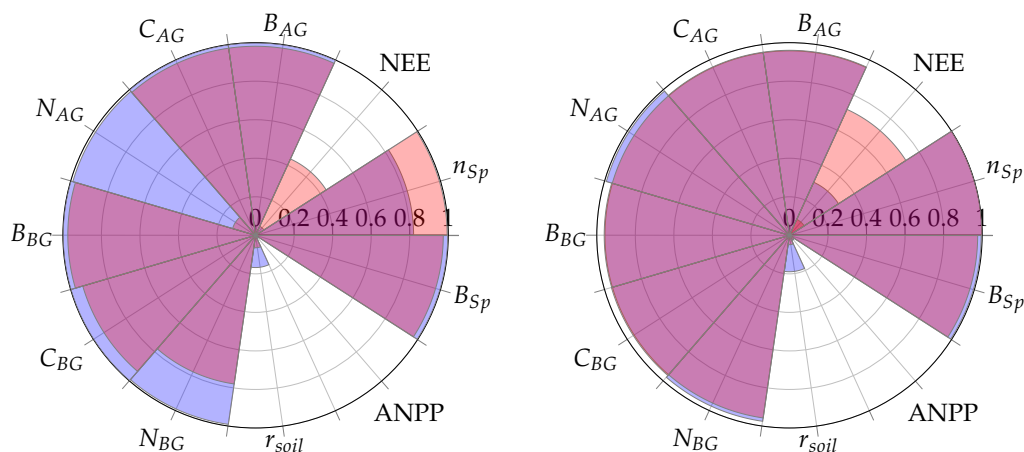

**Figure 3.** Overall model performance ( $R^2$ ) for both models and sites; left = HF-EMS; right = JERC-RD; periwinkle = PPA-SiBGC; pink = LANDIS-II NECN; violet = intersection

373 On average, PPA-SiBGC outperformed LANDIS-II NECN across the sites and metrics tested,  
 374 showing higher correlations, lower error, and less bias overall (HF-EMS  $\bar{R}^2 = 0.73$ ,  $+0.07$ ,  $\bar{RMSE} =$   
 375  $4.84$ ,  $-0.39$ ,  $\bar{ME} = -1.18$ ,  $-3.70$ ; JERC-RD  $R^2 = 0.76$ ,  $+0.04$ ,  $\bar{RMSE} = 2.69$ ,  $-0.17$ ,  $\bar{ME} = 0.78$ ,  $+0.53$ ).  
 376 This result is based on calculating mean values for  $R^2$ , RMSE, MAE, and ME in order to clearly translate  
 377 the overall results. The two models produced the following mean values for each of the four statistical  
 378 metrics and two sites:

**Table 6.** Overall mean values across each of the sites and metrics tested

| Metric | PPA-SiBGC |      |      |       | LANDIS-II NECN |      |      |      |
|--------|-----------|------|------|-------|----------------|------|------|------|
|        | $R^2$     | RMSE | MAE  | ME    | $R^2$          | RMSE | MAE  | ME   |
| Mean   | 0.74      | 3.77 | 3.58 | -0.20 | 0.69           | 9.60 | 8.73 | 2.31 |

379 As shown in [Table 6](#), PPA-SiBGC yielded higher  $R^2$  values and lower RMSE, MAE, and ME values  
 380 in comparison to LANDIS-II, on average, across all sites and metrics tested. Below, we provide model  
 381 intercomparison results individually for the two sites, HF-EMS and JERC-RD.

### 382 3.1. HF-EMS

383 For the HF-EMS site, PPA-SiBGC showed higher  $R^2$  values and lower RMSE, MAE, and ME values  
 384 compared to LANDIS-II NECN across the range of metrics. While PPA-SiBGC predicted NEE and  
 385 species relative abundance showed weaker correlations with observed values compared to LANDIS-II  
 386 NECN, the magnitude of error was lower, as evidenced by lower RMSE, MAE, and ME values. While  
 387 LANDIS-II NECN showed a lower magnitude of error for belowground N, this is the only metric  
 388 where this is the case, while the correlation of this metric to observed values was also lower than that  
 389 of PPA-SiBGC. Overall results for the HF-EMS site model intercomparison are shown in [Table 7](#).

**Table 7.** Model fitness for HF-EMS

| Metric     | PPA-SiBGC |       |       |        | LANDIS-II NECN |        |        |        |
|------------|-----------|-------|-------|--------|----------------|--------|--------|--------|
|            | $R^2$     | RMSE  | MAE   | ME     | $R^2$          | RMSE   | MAE    | ME     |
| NEE        | 0.05      | 0.19  | 0.16  | -0.03  | 0.44           | 0.49   | 0.44   | 0.44   |
| $B_{AG}$   | 1.00      | 10.12 | 10.11 | 10.11  | 0.98           | 2.48   | 2.48   | -2.48  |
| $C_{AG}$   | 1.00      | 0.03  | 0.03  | -0.02  | 0.98           | 1.24   | 1.24   | -1.24  |
| $N_{AG}$   | 0.99      | 1.44  | 1.44  | -1.44  | 0.12           | 1.99   | 1.99   | -1.99  |
| $B_{BG}$   | 1.00      | 9.09  | 9.08  | 9.08   | 0.97           | 2.82   | 2.82   | -2.82  |
| $C_{BG}$   | 1.00      | 7.82  | 7.81  | -7.81  | 0.93           | 9.87   | 9.86   | -9.86  |
| $N_{BG}$   | 0.99      | 0.56  | 0.56  | 0.56   | 0.78           | 0.12   | 0.12   | -0.12  |
| $r_{soil}$ | 0.17      | 0.63  | 0.62  | -0.62  | 0.06           | 1.10   | 1.10   | -1.10  |
| ANPP       | 0.02      | 0.20  | 0.20  | -0.20  | 0.0002         | 0.82   | 0.79   | 0.73   |
| $C_{SO}$   | ...       | 26.49 | 26.49 | -26.49 | ...            | 36.63  | 36.63  | -36.63 |
| $N_{SO}$   | ...       | 1.33  | 1.33  | -1.33  | ...            | 1.60   | 1.60   | -1.60  |
| $B_{Sp}$   | 1.00      | 5.02  | 2.89  | 2.89   | 0.97           | 133.70 | 119.87 | 119.87 |
| $n_{Sp}$   | 0.82      | 0.05  | 0.03  | 0      | 0.99           | 0.29   | 0.22   | 0.22   |
| Mean       | 0.73      | 4.84  | 4.67  | -1.18  | 0.66           | 14.86  | 13.78  | 4.88   |

390 Time-series figures allow a visual analysis of the temporal dynamics between observations and  
 391 model predictions in order to assess the ability of models to capture interannual variability. Both  
 392 models effectively captured temporal dynamics in biomass, C, and, species biomass and abundance.  
 393 In [Figure 4](#), the temporal differences in modeled NEE and aboveground C are shown for the two  
 394 models in comparison to observations for the HF-EMS site. While LANDIS-II NECN predicted NEE  
 395 showed a higher correlation with observations, the magnitude of error and bias were also higher.  
 396 Furthermore, LANDIS-II NECN predicted that the HF-EMS site is a net C source, rather than sink, in  
 397 contrary to observations. Meanwhile, PPA-SiBGC outperformed LANDIS-II NECN in aboveground C  
 398 per both  $R^2$  and RMSE. Both models overpredicted species cohort biomass, while LANDIS-II NECN  
 399 underpredicted total aboveground C.

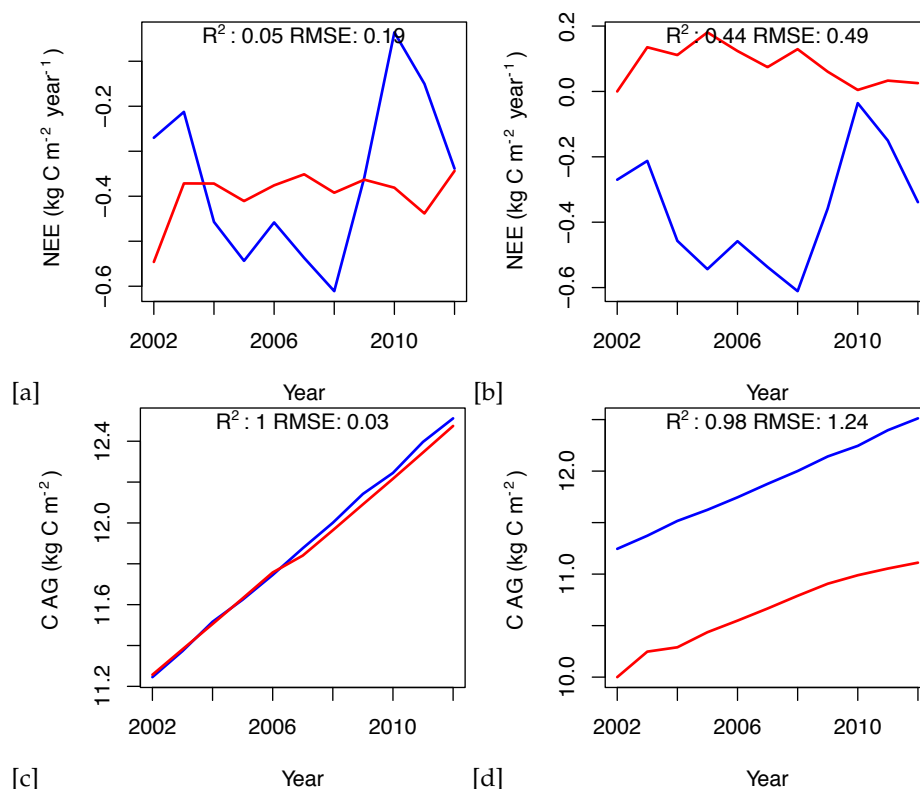

**Figure 4.** Simulated and observed NEE and aboveground C; observations = blue; simulations = red; a = PPA-SiBGC NEE; b = LANDIS-II NECN NEE; c = PPA-SiBGC  $C_{AG}$ ; d = LANDIS-II NECN  $C_{AG}$

400 An analysis of simulated species biomass and abundance also shows greater fidelity of the  
 401 PPA-SiBGC model to data, as shown in Figure 5. As LANDIS-II NECN does not contain data on  
 402 individual trees, species relative abundance is calculated based on the number of cohorts of each  
 403 species. Two species were simulated in LANDIS-II NECN, as there are no explicit trees in the model  
 404 and the number of cohorts appears to have no effect on the total biomass. Results for PPA-SiBGC  
 405 indicate that species relative abundance may be improved in future studies by optimizing mortality  
 406 and fecundity rates. Meanwhile, species biomass predictions output by LANDIS-II NECN were  
 407 inverted from those of the observations.



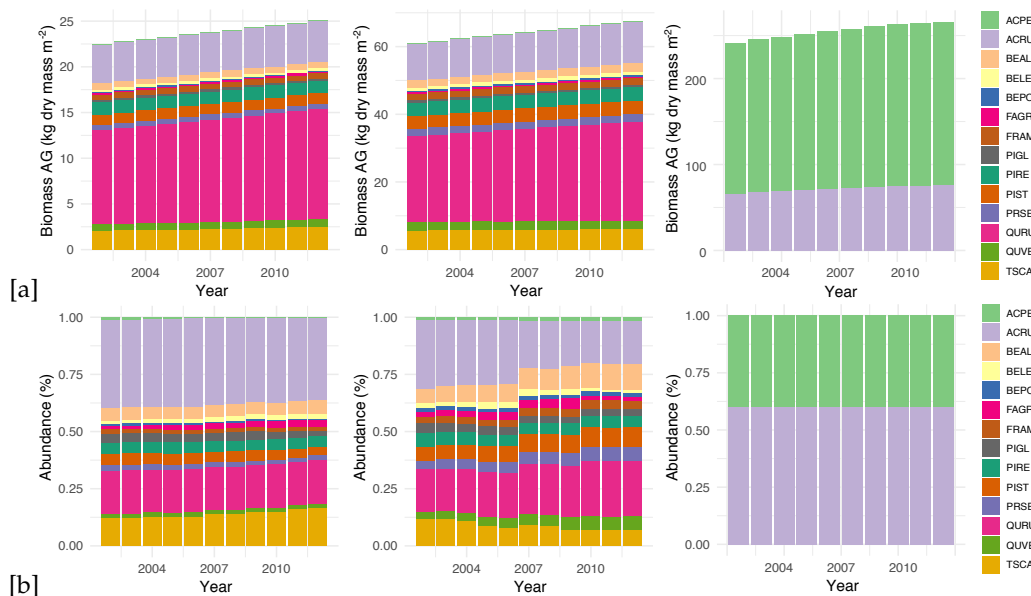

**Figure 5.** HF-EMS: Simulated and observed species aboveground biomass and relative abundance; a = biomass; b = abundance; left = observations, middle = PPA-SiBGC, right = LANDIS-II NECN; note that different scales are used for biomass

### 408 3.2. JERC-RD

409 For the JERC-RD site, both models showed stronger fidelity to data than for the HF-EMS site.  
 410 Again, PPA-SiBGC showed higher  $R^2$  values and lower RMSE and MAE values compared to LANDIS-II  
 411 NECN across the range of metrics tested. Yet, the margin between models was smaller for the JERC  
 412 RD site. While PPA-SiBGC demonstrated higher correlations and lower errors for most metrics tested,  
 413 LANDIS-II NECN outperformed PPA-SiBGC in a few cases. This includes lower error magnitude  
 414 for NEE, aboveground N, belowground biomass, SOC, and SON. However, PPA-SiBGC showed  
 415 correlations equal or higher for all metrics tested, and lower errors for all other metrics. Overall results  
 416 for the JERC-RD site model intercomparison are shown in [Table 8](#).

**Table 8.** Model fitness for JERC-RD

| Metric     | PPA-SiBGC |       |       |       | LANDIS-II NECN |       |       |       |
|------------|-----------|-------|-------|-------|----------------|-------|-------|-------|
|            | $R^2$     | RMSE  | MAE   | ME    | $R^2$          | RMSE  | MAE   | ME    |
| NEE        | 0.30      | 1.68  | 1.64  | -1.64 | 0.09           | 0.13  | 0.11  | -0.05 |
| $B_{AG}$   | 0.96      | 1.48  | 1.47  | 1.47  | 0.96           | 9.77  | 9.76  | -9.76 |
| $C_{AG}$   | 0.96      | 1.63  | 1.63  | -1.63 | 0.96           | 4.88  | 4.88  | -4.88 |
| $N_{AG}$   | 0.99      | 0.29  | 0.29  | 0.29  | 0.96           | 0.05  | 0.05  | -0.05 |
| $B_{BG}$   | 0.96      | 10.84 | 10.83 | 10.83 | 0.96           | 1.37  | 1.20  | 1.20  |
| $C_{BG}$   | 0.96      | 5.26  | 5.26  | -5.26 | 0.96           | 6.46  | 6.46  | -6.46 |
| $N_{BG}$   | 0.98      | 1.44  | 1.44  | -1.44 | 0.96           | 1.60  | 1.60  | -1.60 |
| $r_{soil}$ | 0.19      | 0.78  | 0.71  | -0.67 | 0.05           | 2.40  | 2.40  | -2.40 |
| ANPP       | 0.03      | 0.39  | 0.37  | -0.37 | 0.03           | 0.48  | 0.46  | 0.25  |
| $C_{SO}$   | ...       | 4.30  | 4.30  | 4.30  | ...            | 0.17  | 0.17  | -0.17 |
| $N_{SO}$   | ...       | 0.38  | 0.38  | 0.38  | ...            | 0.12  | 0.12  | 0.12  |
| $B_{Sp}$   | 1.00      | 6.47  | 3.90  | 3.90  | 0.98           | 28.97 | 20.52 | 20.52 |
| $n_{Sp}$   | 1.00      | 0.02  | 0.01  | -0    | 1.00           | 0.09  | 0.09  | -0.02 |
| Mean       | 0.76      | 2.69  | 2.48  | 0.78  | 0.72           | 4.34  | 3.68  | -0.25 |

417 While both models showed higher performance at the JERC-RD site, an analysis of simulated  
 418 species biomass and abundance again indicates greater fidelity of the PPA-SiBGC model to data, as

419 shown in Figure 6. While LANDIS-II NECN overpredicts the rate of longleaf pine growth, PPA-SiBGC  
420 nearly perfectly matches observed species abundance and biomass trajectories for all species present.  
421 While the correlations are high, PPA-SiBGC overpredicts the magnitude of biomass here.

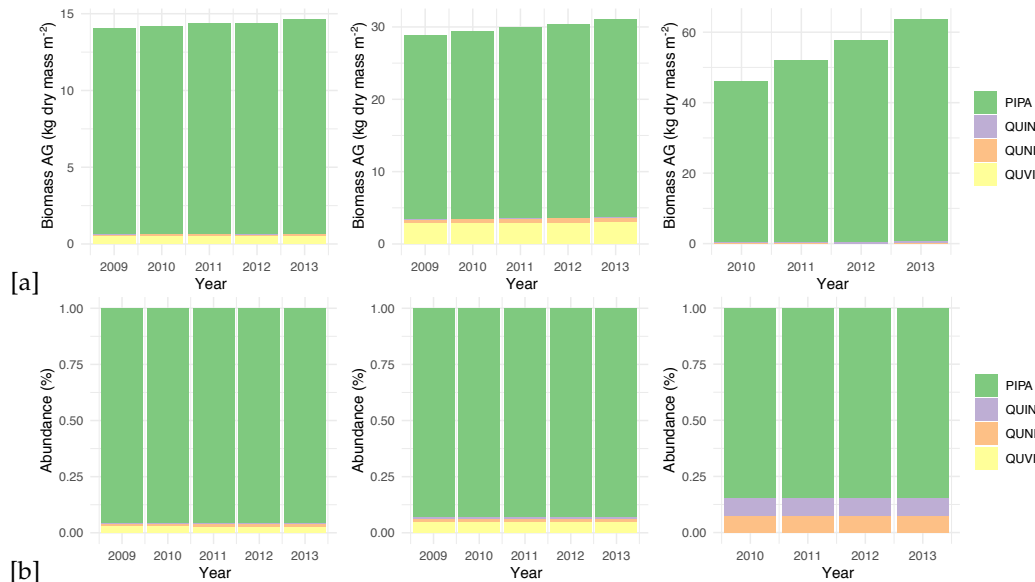

**Figure 6.** JERC-RD: Simulated and observed species aboveground biomass and relative abundance; a = biomass; b = abundance; left = observations, middle = PPA-SiBGC, right = LANDIS-II NECN; note that different scales are used for biomass

422 Our results for the HF-EMS and JERC-RD site model intercomparison exercise clearly indicate  
423 strong performance for both models at both sites. Results for the JERC-RD site are particularly close  
424 between the two models. Next, we assess results related to the logistics of model deployment to new  
425 computers, users, and modeling sites.

### 426 3.3. Model Usability, Performance, and Transferability

427 While the two models share a similar basis in forest dynamics and biogeochemistry modeling,  
428 they differ in important practical and conceptual terms. The command-line version of the PPA-SiBGC  
429 model used in this work, version 5.0, consists of approximately 500 lines of R code and is thus  
430 readily cross-platform, including cloud providers. Meanwhile, the LANDIS-II model core and NECN  
431 succession extension are an estimated 2,000 and 0.5 million lines of code, respectively. While this  
432 version of PPA-SiBGC fuses an explicit tree canopy geometry model with empirical data on fecundity,  
433 growth, mortality, and stoichiometry, the NECN extension of LANDIS-II borrows heavily from the  
434 process-based Century model [20], similar to the MAPSS-Century-1 (MC1) model [82]. This carries  
435 important implications for model parameterization needs. While PPA-SiBGC relies on typical forest  
436 inventory data, including tree species, age/size, and densities, LANDIS-II relies on species age/size  
437 and traits in the form of vital attributes, in addition to NECN parameters. Below, we summarize our  
438 findings regarding the logistics of model deployment.

#### 439 3.3.1. Model Usability

440 In the following section, we provide an assessment of model usability based on four criteria.

##### 441 1. Ease of installation

442 While LANDIS-II NECN requires the installation of two Windows programs, depending on the  
443 options desired, PPA-SiBGC is contained in a single R script and requires only a working R  
444 installation.

445 2. *Ease of parameterization*

446 While both models can be difficult to parameterize for regions with little to no observational data,  
447 the simple biogeochemistry in PPA-SiBGC requires an order of magnitude fewer parameters than  
448 LANDIS-II NECN. In addition, PPA-SiBGC uses commonly available forest inventory data while  
449 NECN requires a number of parameters that may be difficult to locate.

450 3. *Ease of program operation*

451 Both models use a command-line interface and are thus equally easy to operate. Yet, PPA-SiBGC  
452 is cross-platform and uses comma-separated-value (CSV) files for input tables, which are easier  
453 to work with than multiple tables nested within an unstructured text files. This additionally  
454 allows for simplification in designing model application programming interfaces (APIs), or  
455 model wrappers, a layer of abstraction above the models. These abstractions are important for  
456 simplifying model operation and reproducibility, and enable a number of research applications.

457 4. *Ease of parsing outputs*

458 All PPA-SiBGC outputs are provided in CSV files in a single folder while LANDIS-II NECN  
459 generates outputs in multiple formats in multiple folders. While the PPA-SiBGC format is simpler  
460 and easier to parse, the image output formats used by LANDIS-II carry considerable benefit for  
461 spatial applications. Both models may benefit by transitioning spatiotemporal data to the NetCDF  
462 scientific file format used by most general circulation and terrestrial biosphere models.

463 3.3.2. Model Performance

464 Next, we assess model performance in terms of the speed of operation on a consumer-off-the-shelf  
465 (COTS) laptop computer with a dual-core 2.8 GHz Intel Core i7-7600U CPU and 16 GB of DDR4-2400  
466 RAM. We focus on a single performance metric, the timing of simulations. Other aspects of model  
467 performance in the form of precision and accuracy are described in previous sections. As shown in  
468 [Table 9](#), PPA-SiBGC was between 1,200 and 2,800% faster than LANDIS-II NECN in our timing tests.  
469 This was surprising given that PPA-SiBGC models true cohorts (i.e., individual trees) in an interpreted  
470 language while LANDIS-II models theoretical cohorts (i.e., cohorts without a physical basis) in a  
471 compiled language. The difference in speed is likely attributable to the parsimony of the PPA-SiBGC  
472 model.

**Table 9.** Simulation timing results

| Site    | Model          | Duration (years) | Elapsed (sec) |
|---------|----------------|------------------|---------------|
| HF-EMS  | PPA-SiBGC      | 11               | 8.51          |
| HF-EMS  | LANDIS-II NECN | 11               | 101.15        |
| JERC-RD | PPA-SiBGC      | 5                | 2.25          |
| JERC-RD | LANDIS-II NECN | 5                | 61.51         |

473 3.3.3. Model Transferability

474 Here, we discuss model transferability. In this section, we assess the effort required to transfer  
475 the models to new locations, new computer systems, or new users. All three are important logistical  
476 criteria for effective model deployment.

477 1. *Model generalization*

478 Both models appear to generalize effectively to different forested regions of the world, as both  
479 have shown strong performance in this study and others. No clear winner is evident in this regard.  
480 In terms of model realism, PPA-SiBGC has a more realistic representation of forest canopies while  
481 LANDIS-II NECN has more realistic processes, as it is a Century model variant.

482 2. *Availability of parameterization data*

483 While LANDIS-II NECN requires substantially greater parameterization data compared to  
484 PPA-SiBGC, it may often be possible to rely on previously published parameters. Meanwhile,

485 the growth, mortality, and fecundity parameters used by PPA-SiBGC are easy to calculate using  
486 common field inventory data. PPA-SiBGC is simpler to transfer in this regard given the wide  
487 availability of forest inventory data.

488 3. *Size of the program*

489 PPA-SiBGC is approximately 500 lines of R code, while LANDIS-II NECN is estimated at 0.5  
490 million lines of C# code.

491 4. *Cross-platform support*

492 While Linux support may soon be supported with Microsoft .NET Core, LANDIS-II NECN is  
493 written in C# and is thus limited to Microsoft Windows platforms. Meanwhile, PPA-SiBGC is  
494 written in standard R code and is fully cross-platform.

495 5. *Ease of training new users*

496 While both models have a learning curve, the practical simplicity of PPA-SiBGC may make it  
497 easier to train new users. While LANDIS-II NECN contains more mechanistic processes and  
498 related parameters, these come at the cost of confusing new users. The model wrapper library we  
499 developed as part of this work vastly eases the operation of both models. Future studies should  
500 measure the time required for new users to effectively operate both models.

501 3.4. *Discussion*

502 On average, the PPA-SiBGC model outperformed LANDIS-II NECN for the sites and metrics  
503 tested, showing stronger correlations, lower error, and less bias. Despite being a parsimonious model,  
504 PPA-SiBGC contains more realistic representation of stand canopy dynamics. Meanwhile, LANDIS-II  
505 NECN contains more realistic representation of biogeochemical processes, as a simplified variant of  
506 the Century model. These differences together with the results lend support to our hypothesis that  
507 vegetation dynamics drive biogeochemical pools to a higher degree than one-dimensional processes,  
508 while the latter better capture fluxes. This is evidenced by the higher performance of PPA-SiBGC in  
509 predicting pools and LANDIS-II NECN in predicting fluxes.

510 Empirical coefficients for the first moment of processes (e.g., growth, mortality, and fecundity)  
511 were used to parameterize the PPA-SiBGC model, while LANDIS-II NECN required a multitude of  
512 parameters for biogeochemical processes, some of which are often treated as tuning parameters. Yet,  
513 for this validation and intercomparison exercise, fully mechanistic processes were not required; both  
514 models required a host of empirical parameters that limit their prognostic abilities in their current form.  
515 Future developments with both models should improve upon this by adopting more mechanistic  
516 processes.

517 Replacing the simple biogeochemistry approach of PPA-SiBGC with mechanistic processes would  
518 vastly improve the energetic and biogeochemical realism of the PPA-SiBGC model. Meanwhile,  
519 LANDIS-II NECN and other variants of the Century model may improve their structural realism by  
520 incorporating canopy representations with a physical basis. This is because Century was not designed  
521 to be a plant production model [83] and contains no physically realistic representation of trees or  
522 canopies. Currently, the forest production model of Century is based theoretically on Liebig's Law  
523 (i.e., limiting factors), employing allometric and stoichiometric relations with empirical constraints. In  
524 other words, plant production is strongly constrained by site-specific limits even though the Century  
525 model is mechanistic in other ways. Meanwhile, a lack of canopy representation strongly limits the  
526 potential number and resolution of modeled processes. In short, combining the approaches of both  
527 models may yield a more optimal solution.

528 In addition, our results suggest that improving the representation of forest dynamics in models  
529 may yield accurate biogeochemistry predictions even when simple allometric and stoichiometric  
530 biogeochemistry relations are used, as evidenced by the performance of PPA-SiBGC. This finding  
531 supports the current widespread focus on improving the representation of vegetation dynamics in  
532 global terrestrial biosphere models [27,28,84]. The PPA provides a uniquely efficient and tractable  
533 manner of incorporating three-dimensional canopy dynamics in global models. While many

534 mechanistic processes may be considered mature, models of soil respiration are critical to accurate C  
535 projections and require continued development [18]. In order to achieve high levels of accuracy and  
536 precision, given the recent success of aboveground model approximations, next-generation models  
537 may require a similar breakthrough in belowground processes.

538 Future studies should expand upon the PPA with a first-principles representation of energetic  
539 and biogeochemical above- and below-ground processes in a modern component-based software  
540 framework. This work should fuse the new state-of-the-art forest biogeochemistry model with a model  
541 wrapper API written in R or Python, in order to expand native model functions to include sampling  
542 from parameter probability distributions, Monte Carlo methods, machine-learning model emulation,  
543 robust loss functions, and optimization. This would combine a high-performance forest model written  
544 in a compiled language with a user-friendly interface in an interpreted language.

### 545 3.5. Limitations

546 This study, similar to other forest modeling studies, was limited by the availability of observational  
547 data. The lack of temporal depth in this data poses substantial challenges in modeling the long-term  
548 effects of forest succession, as these processes can operate on a century timescale or longer. However,  
549 assessing succession predictions was not the aim of this study, as we instead focus on near-term  
550 validation of forest models using field measurements and EC flux tower data. Another limitation  
551 is that these methods may be challenging to implement for sites that are less well-characterized,  
552 particularly in the absence of EC flux tower data and/or tree species parameters. A combination of  
553 tower-based and remote sensing observations may help overcome this challenge in the coming years  
554 with advances in machine learning.

## 555 4. Conclusions

556 In conclusion, the PPA-SiBGC and LANDIS-II NECN models represent vegetation dynamics  
557 previously absent in modeling studies at these sites. These include, "...long-term increases in tree  
558 biomass, successional change in forest composition, and disturbance events, processes not well  
559 represented in current models," which drive interannual variation in NEE [40]. While the timescale  
560 of our simulations were decidedly short-term due to data limitations, both models showed good  
561 performance. While PPA-SiBGC showed stronger performance across the range of metrics tested,  
562 including the logistics of model deployment, LANDIS-II NECN also performed well across the metrics  
563 tested. Further studies are needed to compare more aspects of these and other models based on an  
564 array of performance criteria.

565 Ultimately, we hope that this study serves as the foundation for future forest ecosystem model  
566 intercomparisons for the North American continent, similar in spirit to the former TDE Ecosystem  
567 Model Intercomparison project [24]. This may help create the impetus for a Global Forest Model  
568 Intercomparison Project (ForestMIP) together with modeling groups on other continents. The aims  
569 of this research were not to determine which model is 'best' for prognosis at two locations, but to  
570 improve the capabilities of existing models across a range of locations in order to advance earth system  
571 models. In this regard, there are beneficial aspects to both modeling approaches and the trade-offs  
572 presented largely depend on the desired application. Counter to the classical modeling trade-off of  
573 Levins [21], improvements in precision and generality resulted from realism.

574 **Supplementary Materials:** Parameter tables for both models and sites are provided in Appendix 4. All model,  
575 parameter, script files used in this model intercomparison exercise are available for download at the following  
576 public GitHub repository:

577 <https://github.com/adam-erickson/ecosystem-model-comparison>

578 The repository provides tables containing parameter values and climate drivers used in the PPA-SiBGC and  
579 LANDIS-II NECN model simulations for the two model intercomparison sites. Tree species codes are adopted  
580 from the USDA PLANTS database, accessible at the following URL:

581 <https://plants.sc.gov.usda.gov>

582 Scripts provided include a simple object-oriented forest biogeochemistry model wrapper library  
583 implemented in the R language [79]. The model wrapper library includes a number of features for simplifying the  
584 operation of this class of models, including functions for cleaning up and parsing model outputs into memory  
585 in a common format for comparison. Importantly, the wrapper library enables full reproducibility of results  
586 through the *hf\_ems.r* and *jerc\_rd.r* scripts. Using these scripts with the object-oriented *classes.r* model wrapper, it  
587 is possible to load pre-computed model results and calculate all intercomparison metrics for verification. The  
588 directory structure of the repository is shown in Figure 7.

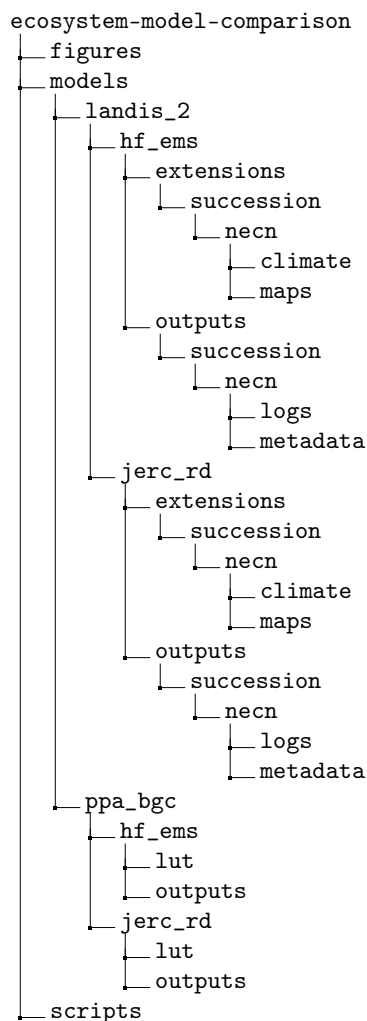

Figure 7. Directory structure of the GitHub repository

589 **Author Contributions:** Individual contributions provided to complete this work include the following:  
590 conceptualization, N.S.; methodology, A.E. and N.S.; software, A.E.; validation, A.E.; formal analysis, A.E.;  
591 investigation, A.E.; resources, N.S.; data curation, A.E.; writing—original draft preparation, A.E.; writing—review  
592 and editing, A.E. and N.S.; visualization, A.E.; supervision, N.S.; project administration, N.S.; funding acquisition,  
593 N.S.

594 **Funding:** This research was funded by United States Army Corps of Engineers (USACE) contract number  
595 W912HQ-18-C-0007.

596 **Acknowledgments:** We would like to thank U.S. Department of Defense, Army Corps of Engineers, and the  
597 Environmental Security Technology Certification Program (ESTCP) for providing support necessary to conduct  
598 this work. We also thank Harvard University and Jones Ecological Research Center for kindly providing data  
599 to conduct the analyses. We would further like to thank those that provided guidance on parameterization of  
600 the LANDIS-II model. We thank Drs. Louise Loudermilk of USDA Forest Service and Steven Flanagan of Tall  
601 Timbers Research Station for providing guidance on parameterization for the Red Dirt flux tower site at JERC,  
602 and Dr. Matthew Duveneck of New England Conservatory for providing guidance on parameterization for the



603 HF-EMS EC flux tower site at Harvard Forest. We also acknowledge Drs. Melissa Lucash and Robert Scheller, who  
604 provided comments. Last, we would like to thank Drs. Bradley Case, Hannah Buckley, Audrey Barket-Plotkin,  
605 David Orwig, Aaron Ellison and Zachary Robbins for providing some of the crown allometry parameters for  
606 Harvard Forest.

607 **Conflicts of Interest:** The authors declare no conflict of interest. The funders had no role in the design of the  
608 study; in the collection, analyses, or interpretation of data; in the writing of the manuscript, or in the decision to  
609 publish the results.

## 610 Abbreviations

611 The following abbreviations are used in this manuscript:

|               |                                                                     |
|---------------|---------------------------------------------------------------------|
| ANPP          | Aboveground net primary production                                  |
| API           | Application programming interface                                   |
| BGC           | Biogeochemistry                                                     |
| COST          | Cooperation in Science and Technology                               |
| CPU           | Central processing unit                                             |
| CSV           | Comma-separated values                                              |
| DoD           | Department of Defense                                               |
| EC            | Eddy covariance                                                     |
| ED            | Ecosystem Demography model                                          |
| EMS           | Environmental Measurement Station                                   |
| FVS           | Forest Vegetation Simulator                                         |
| GPGPU         | General-purpose graphics processing unit                            |
| HF            | Harvard Forest                                                      |
| IBIS2         | Integrated Biosphere Simulator 2                                    |
| JERC          | Jones Ecological Research Center                                    |
| L-systems     | Lindenmayer systems                                                 |
| 612 LANDIS-II | Landscape Disturbance and Succession model 2                        |
| LM3           | Land Model 3                                                        |
| LPJ-GUESS     | Lund-Potsdam-Jena General Ecosystem Simulator                       |
| MAE           | Mean absolute error                                                 |
| MC1           | MAPSS-Century-1 model                                               |
| NECN          | Net Ecosystem Carbon and Nitrogen model                             |
| NEE           | Net ecosystem exchange                                              |
| NSE           | Nash-Sutcliffe efficiency                                           |
| PPA           | Perfect Plasticity Approximation model                              |
| ProFoUnd      | Towards robust projections of European forests under climate change |
| RAM           | Random access memory                                                |
| RD            | Red Dirt                                                            |
| RMSE          | Root mean squared error                                             |
| SAS           | Size- and age-structured equations                                  |
| SOC           | Soil organic carbon                                                 |
| SON           | Soil organic nitrogen                                               |
| TDE           | Throughfall Displacement Experiment                                 |

## 613 References

- 614 1. Vuokila, Y. Functions for variable density yield tables of pine based on temporary sample plots. Technical  
615 report, Finnish Forest Research Institute, Helsinki, Finland, 1965.
- 616 2. Usher, M.B. A Matrix Approach to the Management of Renewable Resources, with Special Reference to  
617 Selection Forests. *Journal of Applied Ecology* **1966**, *3*, 355–367. doi:10.2307/2401258.
- 618 3. Stage, A.R. Prognosis model for stand development. Res. Pap. INT-RP-137. Technical report, U.S. Dept. of  
619 Agriculture, Forest Service, Intermountain Forest and Range Experiment Station, Ogden, Utah, USA, 1973.
- 620 4. Crookston, N.L.; Dixon, G.E. The forest vegetation simulator: A review of its structure,  
621 content, and applications. *Computers and Electronics in Agriculture* **2005**, *49*, 60–80.  
622 doi:<https://doi.org/10.1016/j.compag.2005.02.003>.

- 623 5. Systems, N.; Products, W.; Bugmann, H.; Yan, X.; Sykes, M.; Martin, P.; Lindner, M.; Desanker, P.; Cumming,  
624 S. A comparison of forest gap models: Model structure and behaviour. *Climatic Change* **1996**, *34*, 289–313.  
625 doi:10.1007/BF00224640.
- 626 6. Keane, R.E.; Cary, G.J.; Davies, I.D.; Flannigan, M.D.; Gardner, R.H.; Lavorel, S.; Lenihan, J.M.; Li, C.; Rupp,  
627 T. A classification of landscape fire succession models: spatial simulations of fire and vegetation dynamics.  
628 *Ecological Modelling* **2004**, *179*, 3 – 27. doi:<https://doi.org/10.1016/j.ecolmodel.2004.03.015>.
- 629 7. Mladenoff, D.J. LANDIS and forest landscape models. *Ecological Modelling* **2004**, *180*, 7–19.  
630 doi:10.1016/j.ecolmodel.2004.03.016.
- 631 8. He, H.S. Forest landscape models: Definitions, characterization, and classification. *Forest Ecology and*  
632 *Management* **2008**, *254*, 484–498. doi:10.1016/j.foreco.2007.08.022.
- 633 9. Xi, W.; Coulson, R.N.; Birt, A.G.; Shang, Z.B.; Waldron, J.D.; Lafon, C.W.; Cairns, D.M.; Tchakerian, M.D.;  
634 Klepzig, K.D. Review of forest landscape models: Types, methods, development and applications. *Acta*  
635 *Ecologica Sinica* **2009**, *29*, 69–78. doi:10.1016/j.chnaes.2009.01.001.
- 636 10. Shifley, S.R.; He, H.S.; Lischke, H.; Wang, W.J.; Jin, W.; Gustafson, E.J.; Thompson, J.R.; Thompson, F.R.;  
637 Dijak, W.D.; Yang, J. The past and future of modeling forest dynamics: from growth and yield curves to  
638 forest landscape models. *Landscape Ecology* **2017**, *32*, 1307–1325. doi:10.1007/s10980-017-0540-9.
- 639 11. Sellers, P.J.; Mintz, Y.; Sud, Y.C.; Dalcher, A. A Simple Biosphere Model (SIB) for Use  
640 within General Circulation Models. *Journal of the Atmospheric Sciences* **1986**, *43*, 505–531.  
641 doi:10.1175/1520-0469(1986)043<0505:ASBMFU>2.0.CO;2.
- 642 12. Fisher, J.B.; Huntzinger, D.N.; Schwalm, C.R.; Sitch, S. Modeling the Terrestrial Biosphere. *Annual Review*  
643 *of Environment and Resources* **2014**, *39*, 91–123. doi:10.1146/annurev-environ-012913-093456.
- 644 13. Fisher, R.A.; Koven, C.D.; Anderegg, W.R.L.; Christoffersen, B.O.; Dietze, M.C.; Farnior, C.E.; Holm,  
645 J.A.; Hurtt, G.C.; Knox, R.G.; Lawrence, P.J.; Lichstein, J.W.; Longo, M.; Matheny, A.M.; Medvigy, D.;  
646 Muller-Landau, H.C.; Powell, T.L.; Serbin, S.P.; Sato, H.; Shuman, J.K.; Smith, B.; Trugman, A.T.; Viskari, T.;  
647 Verbeeck, H.; Weng, E.; Xu, C.; Xu, X.; Zhang, T.; Moorcroft, P.R. Vegetation demographics in Earth System  
648 Models: A review of progress and priorities. *Global Change Biology* **2018**, *24*, 35–54. doi:10.1111/gcb.13910.
- 649 14. Duursma, R.A.; Medlyn, B.E. MAESPA: a model to study interactions between water limitation,  
650 environmental drivers and vegetation function at tree and stand levels, with an example application to  
651 CO<sub>2</sub> x drought interactions. *Geoscientific Model Development* **2012**, *5*, 919–940. doi:10.5194/gmd-5-919-2012.
- 652 15. Liénard, J.; Strigul, N. An individual-based forest model links canopy dynamics and shade tolerances  
653 along a soil moisture gradient. *Royal Society Open Science* **2016**, *3*.
- 654 16. Landsberg, J.J.; Waring, R.H. A generalised model of forest productivity using simplified concepts of  
655 radiation-use efficiency, carbon balance and partitioning. *Forest Ecology and Management* **1997**, *95*, 209–228.  
656 doi:[http://dx.doi.org/10.1016/S0378-1127\(97\)00026-1](http://dx.doi.org/10.1016/S0378-1127(97)00026-1).
- 657 17. Farquhar, G.D.; von Caemmerer, S.; Berry, J.A. A biochemical model of photosynthetic CO<sub>2</sub> assimilation in  
658 leaves of C<sub>3</sub> species. *Planta* **1980**, *149*, 78–90. doi:10.1007/BF00386231.
- 659 18. Sulman, B.N.; Moore, J.A.M.; Abramoff, R.; Averill, C.; Kivlin, S.; Georgiou, K.; Sridhar, B.; Hartman, M.D.;  
660 Wang, G.; Wieder, W.R.; Bradford, M.A.; Luo, Y.; Mayes, M.A.; Morrison, E.; Riley, W.J.; Salazar, A.; Schimel,  
661 J.P.; Tang, J.; Classen, A.T. Multiple models and experiments underscore large uncertainty in soil carbon  
662 dynamics. *Biogeochemistry* **2018**, *141*, 109–123. doi:10.1007/s10533-018-0509-z.
- 663 19. Parton, W. Simulation of organic matter formation and mineralization in semi-arid agroecosystems.  
664 *Nutrient Cycling in Agricultural Ecosystems Spec. Publ.* **23** **1983**, pp. 533–550.
- 665 20. Parton, W.J.; Schimel, D.S.; Cole, C.V.; Ojima, D.S. Analysis of Factors Controlling Soil Organic  
666 Matter Levels in Great Plains Grasslands1. *Soil Science Society of America Journal* **1987**, *51*, 1173–1179.  
667 doi:10.2136/sssaj1987.03615995005100050015x.
- 668 21. Levins, R. The Strategy of Model Building in Population Biology. *American Scientist* **1966**, *54*, 421–431.
- 669 22. Warszawski, L.; Frieler, K.; Huber, V.; Piontek, F.; Serdeczny, O.; Schewe, J. The Inter-Sectoral Impact Model  
670 Intercomparison Project (ISI-MIP): Project framework. *Proceedings of the National Academy of Sciences* **2014**,  
671 *111*, 3228–3232, [<http://www.pnas.org/content/111/9/3228.full.pdf>]. doi:10.1073/pnas.1312330110.
- 672 23. Lischke, H.; Speich, M.; Schmatz, D.; Vacchiano, G.; Mairota, P.; Leronna, V.; Schuler, L.; Bugmann, H.;  
673 Bruna, J.; Thom, D.; Seidl, R.; Reineking, B. CoFoLaMo: Comparing forest landscape model simulations  
674 under different climate, interaction- and land use scenarios. EGU General Assembly Conference Abstracts,  
675 2016, Vol. 18, *EGU General Assembly Conference Abstracts*, pp. EPSC2016–13867.

- 676 24. Hanson, P.J.; Amthor, J.S.; Wullschleger, S.D.; Wilson, K.B.; Grant, R.F.; Hartley, A.; Hui, D.; Hunt, E.R.;  
677 Johnson, D.W.; Kimball, J.S.; King, A.W.; Luo, Y.; McNulty, S.G.; Sun, G.; Thornton, P.E.; Wang, S.; Williams,  
678 M.; Baldocchi, D.D.; Cushman, R.M. Oak Forest Carbon and Water Simulations: Model Intercomparisons  
679 and Evaluations against Independent Data. *Ecological Monographs* **2004**, *74*, 443–489.
- 680 25. Kimmins, J.; Mailly, D.; Seely, B. Modelling forest ecosystem net primary production: the hybrid simulation  
681 approach used in forecast. *Ecological Modelling* **1999**, *122*, 195–224. doi:10.1016/S0304-3800(99)00138-6.
- 682 26. Kimmins, H.; Blanco, J.A.; Seely, B.; Welham, C.; Scoullar, K. *Forecasting Forest Futures: A Hybrid Modelling*  
683 *Approach to the Assessment of Sustainability of Forest Ecosystems and Their Values*; Taylor & Francis Group,  
684 2010; p. 296.
- 685 27. Fisher, R.; McDowell, N.; Purves, D.; Moorcroft, P.; Sitch, S.; Cox, P.; Huntingford, C.; Meir, P.; Ian  
686 Woodward, F. Assessing uncertainties in a second-generation dynamic vegetation model caused by  
687 ecological scale limitations. *New Phytologist* **2010**, *187*, 666–681. doi:10.1111/j.1469-8137.2010.03340.x.
- 688 28. Ahlström, A.; Xia, J.; Arneth, A.; Luo, Y.; Smith, B. Importance of vegetation dynamics for future terrestrial  
689 carbon cycling. *Environmental Research Letters* **2015**, *10*, 054019.
- 690 29. Sitch, S.; Smith, B.; Prentice, I.C.; Arneth, A.; Bondeau, A.; Cramer, W.; Kaplan, J.O.; Levis, S.; Lucht, W.;  
691 Sykes, M.T.; Thonicke, K.; Venevsky, S. Evaluation of ecosystem dynamics, plant geography and terrestrial  
692 carbon cycling in the LPJ dynamic global vegetation model. *Global Change Biology* **2003**, *9*, 161–185.  
693 doi:10.1046/j.1365-2486.2003.00569.x.
- 694 30. Moorcroft, P.R.; Hurtt, G.C.; Pacala, S.W. A method for scaling vegetation dynamics:  
695 The ecosystem demography model (ED). *Ecological Monographs* **2001**, *71*, 557–586.  
696 doi:10.1890/0012-9615(2001)071[0557:AMFSVD]2.0.CO;2.
- 697 31. Medvigy, D.; Wofsy, S.C.; Munger, J.W.; Hollinger, D.Y.; Moorcroft, P.R. Mechanistic scaling of ecosystem  
698 function and dynamics in space and time: Ecosystem Demography model version 2. *Journal of Geophysical*  
699 *Research: Biogeosciences* **2009**, *114*. doi:10.1029/2008JG000812.
- 700 32. Weng, E.S.; Malyshev, S.; Lichstein, J.W.; Farrior, C.E.; Dybzinski, R.; Zhang, T.; Shevliakova, E.;  
701 Pacala, S.W. Scaling from individual trees to forests in an Earth system modeling framework using  
702 a mathematically tractable model of height-structured competition. *Biogeosciences* **2015**, *12*, 2655–2694.  
703 doi:10.5194/bg-12-2655-2015.
- 704 33. Strigul, N.; Pristinski, D.; Purves, D.; Dushoff, J.; Pacala, S. Scaling from trees to forests:  
705 tractable macroscopic equations for forest dynamics. *Ecological Monographs* **2008**, *78*, 523–545,  
706 [<http://www.esajournals.org/doi/pdf/10.1890/08-0082.1>]. doi:10.1890/08-0082.1.
- 707 34. Purves, D.W.; Lichstein, J.W.; Strigul, N.; Pacala, S.W. Predicting and understanding forest dynamics  
708 using a simple tractable model. *Proceedings of the National Academy of Sciences* **2008**, *105*, 17018–17022,  
709 [<http://www.pnas.org/content/105/44/17018.full.pdf>]. doi:10.1073/pnas.0807754105.
- 710 35. Davis, A.V. Testing LANDIS-II to stochastically model spatially abstract vegetation trends in the contiguous  
711 United States. Thesis, University of Southern California, 2013.
- 712 36. Strigul, N. Individual-based models and scaling methods for ecological forestry: implications of tree  
713 phenotypic plasticity. In *Sustainable Forest Management*; Garcia, J.; Casero, J., Eds.; InTech: Rijeka, Croatia,  
714 2012; pp. 359–384. <http://dx.doi.org/10.5772/29590>.
- 715 37. Liénard, J.; Strigul, N. An individual-based forest model links canopy dynamics and shade tolerances  
716 along a soil moisture gradient. *Royal Society Open Science* **2016**, *3*, 150589.
- 717 38. Seidl, R.; Rammer, W.; Scheller, R.M.; Spies, T.a. An individual-based process model to  
718 simulate landscape-scale forest ecosystem dynamics. *Ecological Modelling* **2012**, *231*, 87–100.  
719 doi:10.1016/j.ecolmodel.2012.02.015.
- 720 39. Giasson, M.A.; Ellison, A.M.; Bowden, R.D.; Crill, P.M.; Davidson, E.A.; Drake, J.E.; Frey, S.D.;  
721 Hadley, J.L.; Lavine, M.; Melillo, J.M.; Munger, J.W.; Nadelhoffer, K.J.; Nicoll, L.; Ollinger, S.V.;  
722 Savage, K.E.; Steudler, P.A.; Tang, J.; Varner, R.K.; Wofsy, S.C.; Foster, D.R.; Finzi, A.C. Soil  
723 respiration in a northeastern US temperate forest: a 22-year synthesis. *Ecosphere* **2013**, *4*, art140,  
724 [<https://esajournals.onlinelibrary.wiley.com/doi/pdf/10.1890/ES13.00183.1>]. doi:10.1890/ES13.00183.1.
- 725 40. Urbanski, S.; Barford, C.; Wofsy, S.; Kucharik, C.; Pyle, E.; Budney, J.; McKain, K.; Fitzjarrald,  
726 D.; Czikowsky, M.; Munger, J.W. Factors controlling CO<sub>2</sub> exchange on timescales from  
727 hourly to decadal at Harvard Forest. *Journal of Geophysical Research: Biogeosciences* **2007**, *112*,  
728 [<https://agupubs.onlinelibrary.wiley.com/doi/pdf/10.1029/2006JG000293>]. doi:10.1029/2006JG000293.

- 729 41. Scheller, R.M.; Domingo, J.B.; Sturtevant, B.R.; Williams, J.S.; Rudy, A.; Gustafson, E.J.; Mladenoff,  
730 D.J. Design, development, and application of LANDIS-II, a spatial landscape simulation  
731 model with flexible temporal and spatial resolution. *Ecological Modelling* **2007**, *201*, 409–419.  
732 doi:10.1016/j.ecolmodel.2006.10.009.
- 733 42. Scheller, R.M.; Hua, D.; Bolstad, P.V.; Birdsey, R.A.; Mladenoff, D.J. The effects of forest harvest intensity in  
734 combination with wind disturbance on carbon dynamics in Lake States Mesic Forests. *Ecological Modelling*  
735 **2011**, *222*, 144–153. doi:<https://doi.org/10.1016/j.ecolmodel.2010.09.009>.
- 736 43. Whelan, A.; Mitchell, R.; Staudhammer, C.; Starr, G. Cyclic Occurrence of Fire and Its Role in Carbon  
737 Dynamics along an Edaphic Moisture Gradient in Longleaf Pine Ecosystems. *PLOS ONE* **2013**, *8*, 1–15.  
738 doi:10.1371/journal.pone.0054045.
- 739 44. Wiesner, S.; Staudhammer, C.L.; Loescher, H.W.; Baron-Lopez, A.; Boring, L.R.; Mitchell, R.J.; Starr,  
740 G. Interactions Among Abiotic Drivers, Disturbance and Gross Ecosystem Carbon Exchange on Soil  
741 Respiration from Subtropical Pine Savannas. *Ecosystems* **2018**. doi:10.1007/s10021-018-0246-0.
- 742 45. Starr, G.; Staudhammer, C.L.; Loescher, H.W.; Mitchell, R.; Whelan, A.; Hiers, J.K.; O'Brien, J.J. Time series  
743 analysis of forest carbon dynamics: recovery of *Pinus palustris* physiology following a prescribed fire. *New*  
744 *Forests* **2015**, *46*, 63–90. doi:10.1007/s11056-014-9447-3.
- 745 46. Hawkins, D.M. The Problem of Overfitting. *Journal of Chemical Information and Computer Sciences* **2004**,  
746 *44*, 1–12. doi:10.1021/ci0342472.
- 747 47. Mladenoff, D.J.; Host, G.E.; Boeder, J.; Crow, T.R. LANDIS: a spatial model of forest landscape disturbance,  
748 succession, and management. Second International Conference on Integrating Modelling and GIS, 1993.
- 749 48. Mladenoff, D.J.; He, H.S. Design, behavior and application of LANDIS, an object-oriented model of  
750 forest landscape disturbance and succession. In *Spatial Modeling of Forest Landscape Change: Approaches and*  
751 *Applications*; Cambridge University Press: Cambridge, UK, 1999; pp. 125–162.
- 752 49. He, H.S.; Mladenoff, D.J.; Boeder, J. An object-oriented forest landscape model and its representation of  
753 tree species. *Ecological Modelling* **1999**, *119*, 1–19. doi:10.1016/S0304-3800(99)00041-1.
- 754 50. Wang, W.J.; He, H.S.; Fraser, J.S.; Thompson, F.R.; Shifley, S.R.; Spetich, M.A. LANDIS  
755 PRO: a landscape model that predicts forest composition and structure changes at regional scales.  
756 *Ecography* **2014**, *37*, 225–229, [<https://onlinelibrary.wiley.com/doi/pdf/10.1111/j.1600-0587.2013.00495.x>].  
757 doi:10.1111/j.1600-0587.2013.00495.x.
- 758 51. Pennanen, J.; Kuuluvainen, T. A spatial simulation approach to natural forest landscape  
759 dynamics in boreal Fennoscandia. *Forest Ecology and Management* **2002**, *164*, 157–175.  
760 doi:[https://doi.org/10.1016/S0378-1127\(01\)00608-9](https://doi.org/10.1016/S0378-1127(01)00608-9).
- 761 52. Pennanen, J.; Greene, D.F.; Fortin, M.J.; Messier, C. Spatially explicit simulation of long-term  
762 boreal forest landscape dynamics: incorporating quantitative stand attributes. *Ecological Modelling*  
763 **2004**, *180*, 195–209. doi:<https://doi.org/10.1016/j.ecolmodel.2004.02.023>.
- 764 53. Roberts, D.W.; Betz, D.W. Simulating landscape vegetation dynamics of Bryce Canyon National Park with  
765 the vital attributes/fuzzy systems model VAFS/LANDSIM. In *Spatial Modeling of Forest Landscape Change:*  
766 *Approaches and Applications*; Cambridge University Press: Cambridge, UK, 1999; pp. 99–123.
- 767 54. Von Neumann, J.; Burks, A.W.; others. Theory of self-reproducing automata. *IEEE Transactions on Neural*  
768 *Networks* **1966**, *5*, 3–14.
- 769 55. Noble, I.; Slatyer, R. The use of vital attributes to predict successional changes in plant communities subject  
770 to recurrent disturbances. *Succession* **1980**.
- 771 56. Rothermel, Richard C. A mathematical model for predicting fire spread in wildland fuels. Res. Pap.  
772 INT-115. Technical report, U.S. Department of Agriculture, Intermountain Forest and Range Experiment  
773 Station, Ogden, Utah, USA, 1972.
- 774 57. ISO/IEC 14882:1998: *Programming languages — C++*; pub-ISO: pub-ISO:adr, 1998; p. 732. Available in  
775 electronic form for online purchase at <http://webstore.ansi.org/> and <http://www.cssinfo.com/>.
- 776 58. Manabe, S. Climate and the Ocean Circulation. *Monthly Weather Review* **1969**, *97*, 739–774.  
777 doi:10.1175/1520-0493(1969)097<0739:CATOC>2.3.CO;2.
- 778 59. Thompson, J.R.; Foster, D.R.; Scheller, R.; Kittredge, D. The influence of land use and climate change on  
779 forest biomass and composition in Massachusetts, USA. *Ecological applications : a publication of the Ecological*  
780 *Society of America* **2011**, *21*, 2425–44.  
781



- 782 60. Duveneck, M.J.; Thompson, J.R.; Gustafson, E.J.; Liang, Y.; de Bruijn, A.M.G. Recovery dynamics  
783 and climate change effects to future New England forests. *Landscape Ecology* **2017**, *32*, 1385–1397.  
784 doi:10.1007/s10980-016-0415-5.
- 785 61. Duveneck, M.J.; Scheller, R.M.; White, M.A.; Handler, S.D.; Ravenscroft, C. Climate change effects  
786 on northern Great Lake (USA) forests: A case for preserving diversity. *Ecosphere* **2014**, *5*, art23.  
787 doi:10.1890/ES13-00370.1.
- 788 62. Lucash, M.S.; Scheller, R.M.; J. Gustafson, E.; R. Sturtevant, B. Spatial resilience of forested landscapes under  
789 climate change and management. *Landscape Ecology* **2017**, *32*, 953–969. doi:10.1007/s10980-017-0501-3.
- 790 63. Pacala, S.W.; Canham, C.D.; Jr., J.A.S. Forest models defined by field measurements: I. The design of a  
791 northeastern forest simulator. *Canadian Journal of Forest Research* **1993**, *23*, 1980–1988. doi:10.1139/x93-249.
- 792 64. Ribbens, E.; Silander, J.A.; Pacala, S.W. Seedling recruitment in forests: calibrating models to predict  
793 patterns of tree seedling dispersion. *Ecology* **1994**, *75*, 1794–1806. doi:10.2307/1939638.
- 794 65. Hurtt, G.C.; Moorcroft, P.R.; And, S.W.P.; Levin, S.A. Terrestrial models and  
795 global change: challenges for the future. *Global Change Biology* **1998**, *4*, 581–590,  
796 [\[https://onlinelibrary.wiley.com/doi/pdf/10.1046/j.1365-2486.1998.t01-1-00203.x\]](https://onlinelibrary.wiley.com/doi/pdf/10.1046/j.1365-2486.1998.t01-1-00203.x).  
797 doi:10.1046/j.1365-2486.1998.t01-1-00203.x.
- 798 66. Robbins, Z.; Scheller, R.; Case, B.; Strigul, N. The parameterization of PPA formulas using a SORTIE-ND  
799 Model for Harvard Forest. Abstracts of the AMS Spring Western Sectional Meeting, 2018. [http://www.  
800 ams.org/amsmtgs/2248\\_abstracts/1137-92-206.pdf](http://www.ams.org/amsmtgs/2248_abstracts/1137-92-206.pdf).
- 801 67. García, O. Can plasticity make spatial structure irrelevant in individual-tree models? *Forest Ecosystems*  
802 **2014**, *1*, 16.
- 803 68. Lee, M.J.; García, O. Plasticity and extrapolation in modeling mixed-species stands. *Forest Science* **2016**,  
804 *62*, 1–8.
- 805 69. Raich, J.W.; Potter, C.S.; Bhagawati, D. Interannual variability in global  
806 soil respiration, 1980–94. *Global Change Biology* **2002**, *8*, 800–812,  
807 [\[https://onlinelibrary.wiley.com/doi/pdf/10.1046/j.1365-2486.2002.00511.x\]](https://onlinelibrary.wiley.com/doi/pdf/10.1046/j.1365-2486.2002.00511.x).  
808 doi:10.1046/j.1365-2486.2002.00511.x.
- 809 70. Domke, G.M.; Perry, C.H.; Walters, B.F.; Nave, L.E.; Woodall, C.W.; Swanston, C.W. Toward  
810 inventory-based estimates of soil organic carbon in forests of the United States. *Ecological*  
811 *Applications* **2017**, *27*, 1223–1235, [\[https://esajournals.onlinelibrary.wiley.com/doi/pdf/10.1002/eap.1516\]](https://esajournals.onlinelibrary.wiley.com/doi/pdf/10.1002/eap.1516).  
812 doi:10.1002/eap.1516.
- 813 71. Canham, C.D.; Coates, K.D.; Bartemucci, P.; Quaglia, S. Measurement and modeling of spatially explicit  
814 variation in light transmission through interior cedar-hemlock forests of British Columbia. *Canadian Journal*  
815 *of Forest Research* **1999**, *29*, 1775–1783, [\[https://doi.org/10.1139/x99-151\]](https://doi.org/10.1139/x99-151). doi:10.1139/x99-151.
- 816 72. Case, B.S.; Buckley, H.L.; Barker-Plotkin, A.A.; Orwig, D.A.; Ellison, A.M. When a foundation  
817 crumbles: forecasting forest dynamics following the decline of the foundation species *Tsuga canadensis*.  
818 *Ecosphere* **2017**, *8*, e01893, [\[https://esajournals.onlinelibrary.wiley.com/doi/pdf/10.1002/ecs2.1893\]](https://esajournals.onlinelibrary.wiley.com/doi/pdf/10.1002/ecs2.1893).  
819 doi:10.1002/ecs2.1893.
- 820 73. Chojnacky, D.C.; Heath, L.S.; Jenkins, J.C. Updated generalized biomass equations for North  
821 American tree species. *Forestry: An International Journal of Forest Research* **2014**, *87*, 129–151,  
822 [\[http://oup/backfile/content\\_public/journal/forestry/87/1/10.1093/forestry/cpt053/2/cpt053.pdf\]](http://oup/backfile/content_public/journal/forestry/87/1/10.1093/forestry/cpt053/2/cpt053.pdf).  
823 doi:10.1093/forestry/cpt053.
- 824 74. Barford, C.C.; Wofsy, S.C.; Goulden, M.L.; Munger, J.W.; Pyle, E.H.; Urbanski, S.P.; Hutyra,  
825 L.; Saleska, S.R.; Fitzjarrald, D.; Moore, K. Factors Controlling Long- and Short-Term  
826 Sequestration of Atmospheric CO<sub>2</sub> in a Mid-latitude Forest. *Science* **2001**, *294*, 1688–1691,  
827 [\[http://science.sciencemag.org/content/294/5547/1688.full.pdf\]](http://science.sciencemag.org/content/294/5547/1688.full.pdf). doi:10.1126/science.1062962.
- 828 75. HENDRICKS, J.J.; HENDRICK, R.L.; WILSON, C.A.; MITCHELL, R.J.; PECOT, S.D.; GUO, D. Assessing the  
829 patterns and controls of fine root dynamics: an empirical test and methodological review. *Journal of Ecology*  
830 **2005**, *94*, 40–57, [\[https://besjournals.onlinelibrary.wiley.com/doi/pdf/10.1111/j.1365-2745.2005.01067.x\]](https://besjournals.onlinelibrary.wiley.com/doi/pdf/10.1111/j.1365-2745.2005.01067.x).  
831 doi:10.1111/j.1365-2745.2005.01067.x.
- 832 76. Drew, M.B.; Kirkman, L.K.; Angus K. Gholson, J. The Vascular Flora of Ichauway, Baker County, Georgia:  
833 A Remnant Longleaf Pine/Wiregrass Ecosystem. *Castanea* **1998**, *63*, 1–24.

- 834 77. Goebel, P.C.; Hix, D.M. Changes in the composition and structure of mixed-oak, second-growth forest  
835 ecosystems during the understory reinitiation stage of stand development. *Ecoscience* **1997**, *4*, 327–339,  
836 [<https://doi.org/10.1080/11956860.1997.11682412>]. doi:10.1080/11956860.1997.11682412.
- 837 78. Mitchell, R.J.; Kirkman, L.K.; Pecot, S.D.; Wilson, C.A.; Palik, B.J.; Boring, L.R. Patterns and  
838 controls of ecosystem function in longleaf pine - wiregrass savannas. I. Aboveground net primary  
839 productivity. *Canadian Journal of Forest Research* **1999**, *29*, 743–751, [<https://doi.org/10.1139/x99-051>].  
840 doi:10.1139/x99-051.
- 841 79. R Core Team. *R: A Language and Environment for Statistical Computing*. R Foundation for Statistical  
842 Computing, Vienna, Austria, 2018.
- 843 80. Krause, P.; Boyle, D.P.; Bäse, F. Comparison of different efficiency criteria for hydrological model assessment.  
844 *Advances in Geosciences* **2005**, *5*, 89–97. doi:10.5194/adgeo-5-89-2005.
- 845 81. Nash, J.; Sutcliffe, J. River flow forecasting through conceptual models part I — A discussion of principles.  
846 *Journal of Hydrology* **1970**, *10*, 282–290. doi:[https://doi.org/10.1016/0022-1694\(70\)90255-6](https://doi.org/10.1016/0022-1694(70)90255-6).
- 847 82. Bachelet, D.; Lenihan, J.M.; Daly, C.; Neilson, R.P.; Ojima, D.S.; Parton, W.J. MC1: a dynamic vegetation  
848 model for estimating the distribution of vegetation and associated ecosystem fluxes of carbon, nutrients,  
849 and water. *Pacific Northwest Station General Technical Report PNW-GTR-508* **2001**.
- 850 83. Metherell, A.K.; Harding, L.A.; Vernon, C.C.; J, P.W. CENTURY Soil Organic Matter Model Environment,  
851 Agroecosystem Version 4.0, Technical Report No. 4. Technical report, USDA-ARS, Great Plains System  
852 Research Unit, Fort Collins, CO, USA, 1996.
- 853 84. Friend, A.D.; Lucht, W.; Rademacher, T.T.; Keribin, R.; Betts, R.; Cadule, P.; Ciais, P.; Clark, D.B.; Dankers,  
854 R.; Falloon, P.D.; Ito, A.; Kahana, R.; Kleidon, A.; Lomas, M.R.; Nishina, K.; Ostberg, S.; Pavlick, R.;  
855 Peylin, P.; Schaphoff, S.; Vuichard, N.; Warszawski, L.; Wiltshire, A.; Woodward, F.I. Carbon residence  
856 time dominates uncertainty in terrestrial vegetation responses to future climate and atmospheric CO<sub>2</sub>.  
857 *Proceedings of the National Academy of Sciences* **2014**, *111*, 3280–3285. doi:10.1073/pnas.1222477110.

## 858 **Appendix A. Eddy covariance flux tower measurements**

### 859 *Appendix A.1. HF-EMS EC Flux Tower*

860 Recent historical mean daily fluxes of temperature ( $^{\circ}$  C), ecosystem respiration ( $\mu\text{mol CO}_2 \text{ m}^{-2}$ ),  
861 and NEE ( $\mu\text{mol C m}^{-2}$ ) for the HF-EMS tower are shown in [Figure A1](#).



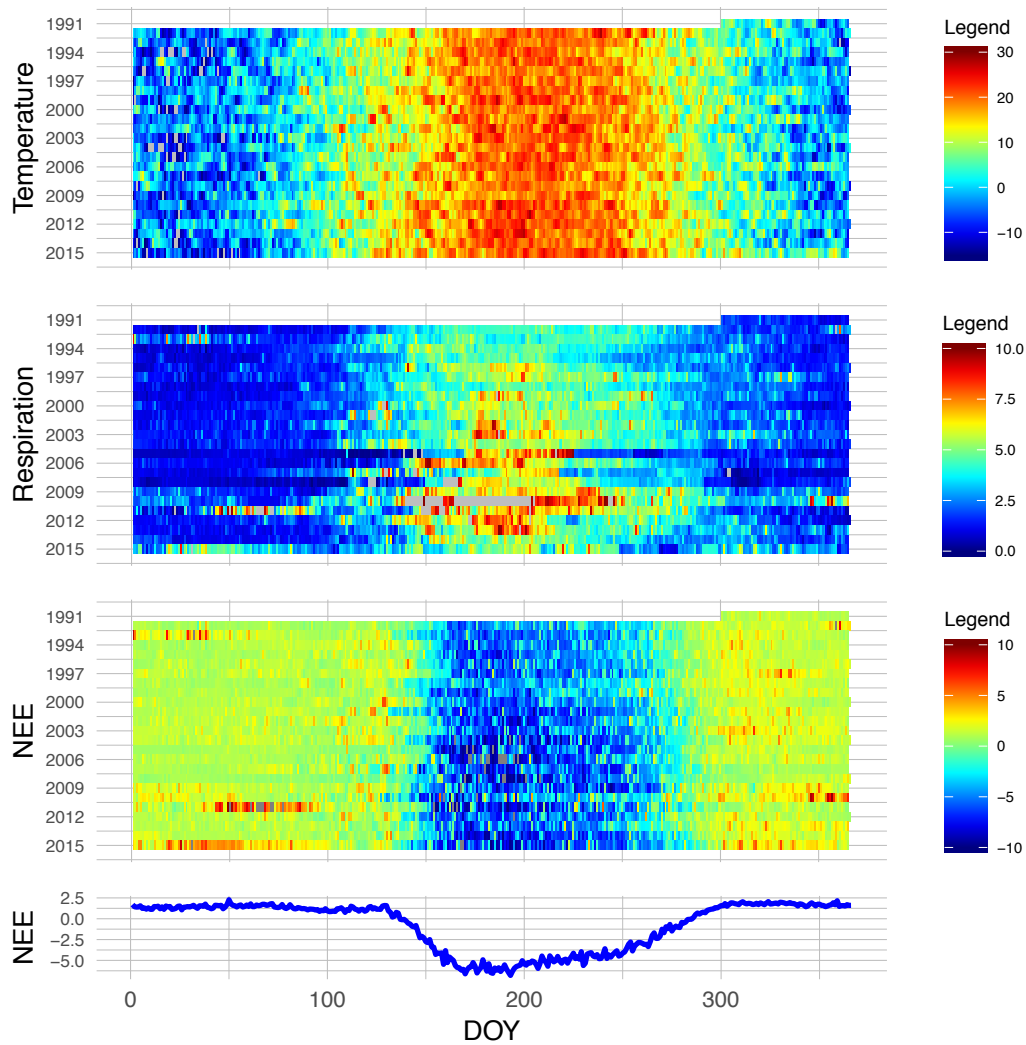

Figure A1. HF-EMS tower daily averages

862 Patterns in daytime and nighttime NEE are shown in [Figure A2](#). This was calculated by taking  
863 daily mean NEE values for three-hour windows surrounding noon and midnight, respectively  
864 (1100-1300 and 2300-0100 hours). These patterns are important to diagnose, as they demonstrate  
865 responses to a gradient of light and temperature conditions.

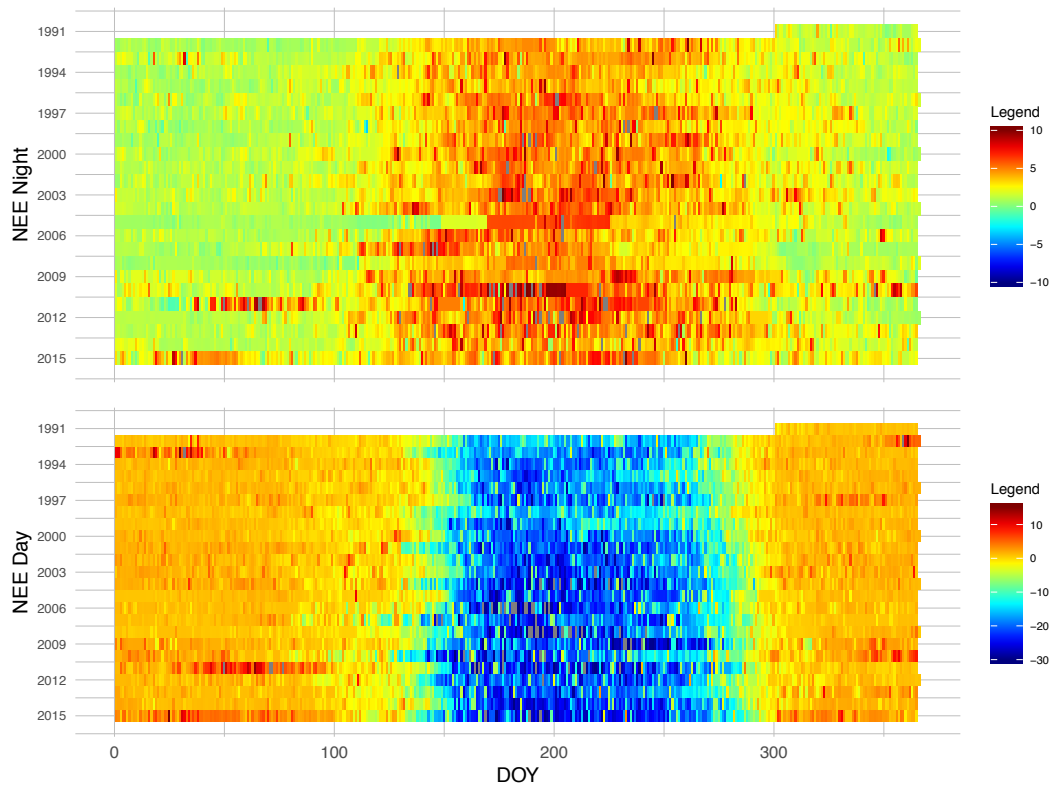

**Figure A2.** HF-EMS tower daily diurnal averages

866 *Appendix A.2. JERC-RD EC Flux Tower*

867 Recent historical mean daily fluxes of latent heat flux (LE) ( $W m^{-2}$ ), ecosystem respiration  
868 ( $\mu mol CO_2 m^{-2}$ ), and NEE ( $\mu mol C m^{-2}$ ) for the RD flux tower are shown in [Figure A3](#).

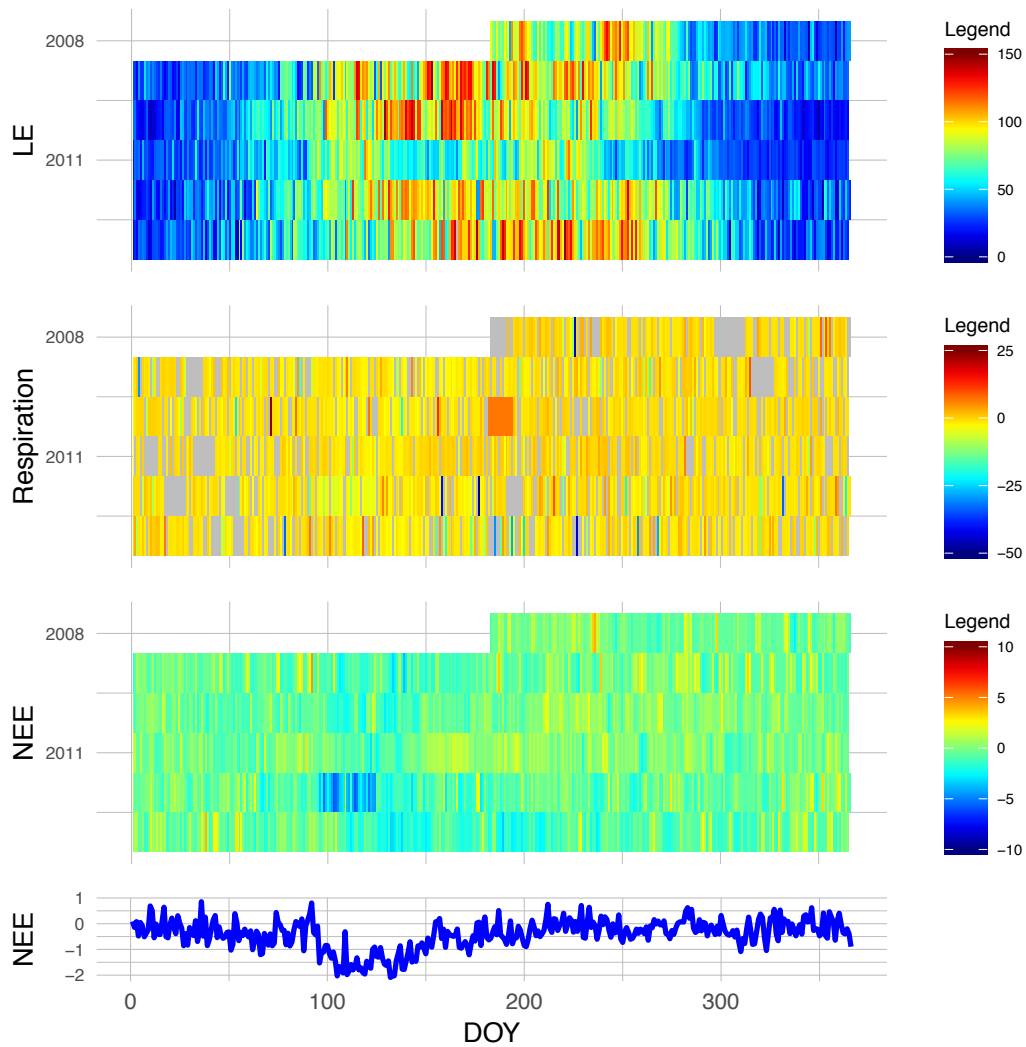

**Figure A3.** JERC-RD tower daily averages

869 Patterns of daytime and nighttime NEE are shown in [Figure A4](#). Again, this was calculated by  
870 taking daily mean NEE values for three-hour windows surrounding noon and midnight, respectively  
871 (1100-1300 and 2300-0100 hours).

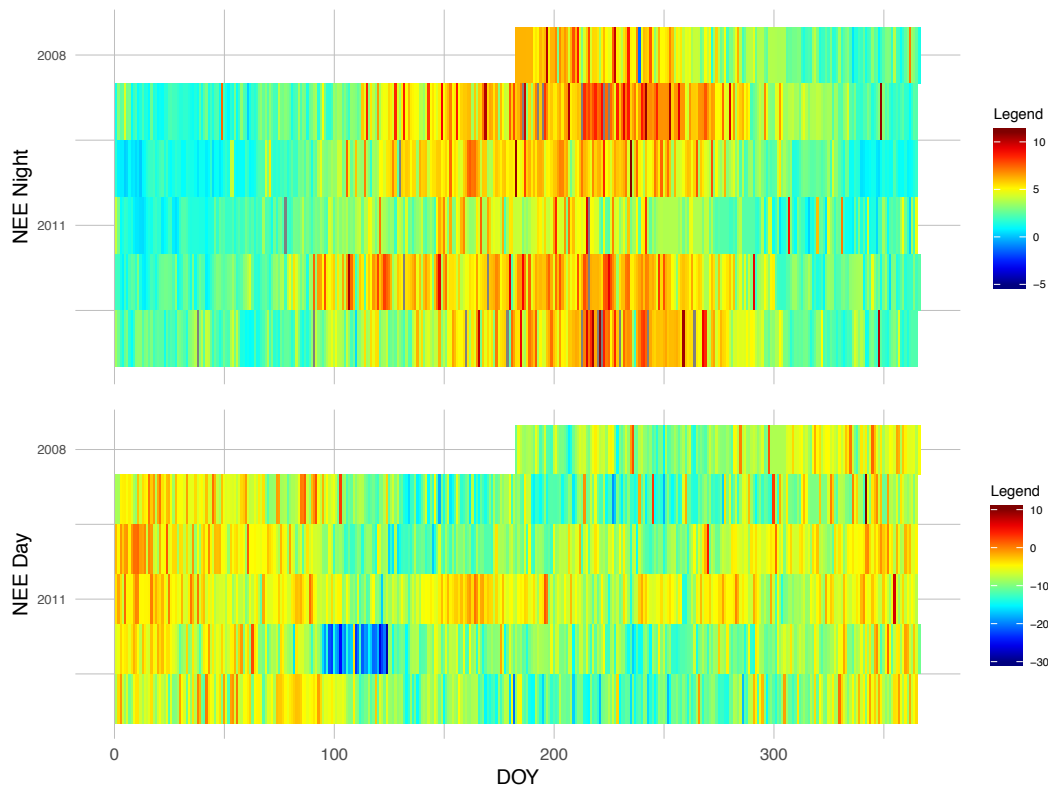

Figure A4. JERC-RD tower daily diurnal averages

872 **Appendix B. Site maps**

873 Below, we provide maps of the two research sites for reference. First is the HF-EMS EC flux tower  
874 with landcover classes [Figure A5](#).

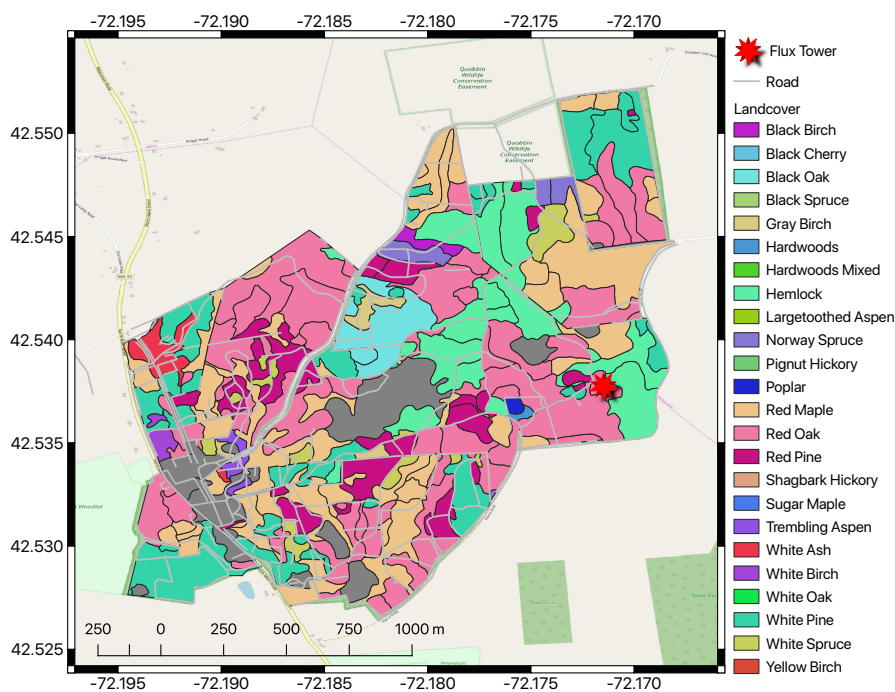

Figure A5. HF-EMS flux tower and landcover classes

875

Next is the JERC-RD flux tower with landcover classes [Figure A6](#).

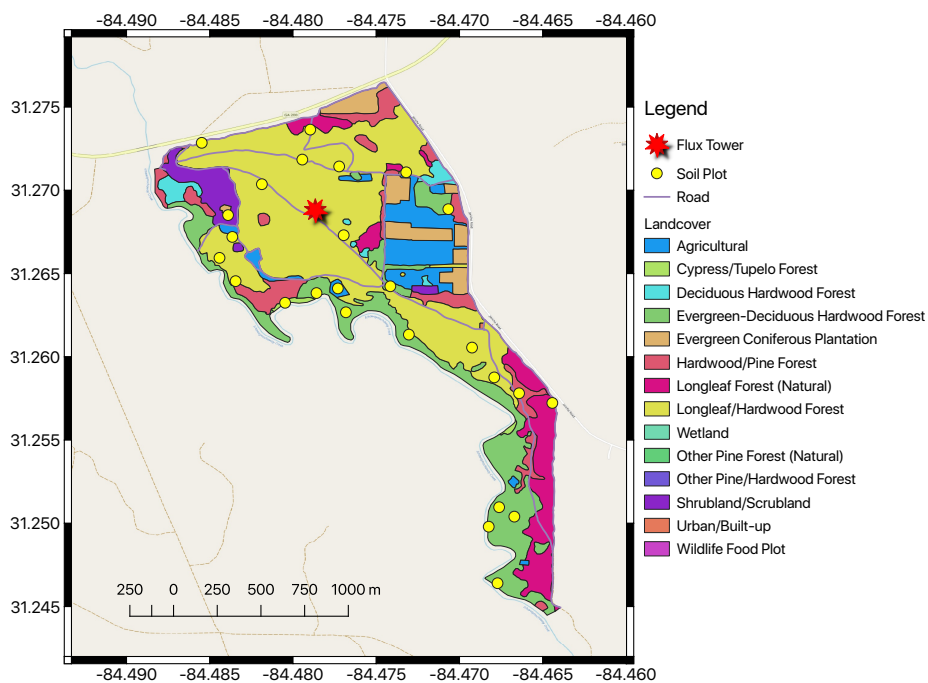

Figure A6. JERC-RD flux tower and landcover classes

876 **Appendix C. Model Parameters**

877 *Appendix C.1. HF-EMS*

878 *Appendix C.1.1. PPA-SiBGC*

**Table A1.** Species crown allometry parameters

| Species | Type    | $h_{coeff}$ | $cr_1$ | $cr_2$ | $cd$  |
|---------|---------|-------------|--------|--------|-------|
| ACPE    | adult   | 0.063       | 0.108  | 1      | 0.490 |
| ACRU    | adult   | 0.063       | 0.108  | 1      | 0.490 |
| BEAL    | adult   | 0.063       | 0.109  | 1      | 0.540 |
| BELE    | adult   | 0.024       | 0.109  | 1      | 0.540 |
| BEPO    | adult   | 0.063       | 0.109  | 1      | 0.540 |
| FAGR    | adult   | 0.035       | 0.152  | 1      | 0.664 |
| FRAM    | adult   | 0.056       | 0.095  | 1      | 0.319 |
| PIGL    | adult   | 0.033       | 0.087  | 1      | 0.413 |
| PIRE    | adult   | 0.033       | 0.087  | 1      | 0.413 |
| PIST    | adult   | 0.033       | 0.087  | 1      | 0.413 |
| PRSE    | adult   | 0.045       | 0.116  | 1      | 0.370 |
| QURU    | adult   | 0.042       | 0.119  | 1      | 0.413 |
| QUVE    | adult   | 0.042       | 0.119  | 1      | 0.413 |
| TSCA    | adult   | 0.024       | 0.100  | 1      | 0.846 |
| ACPE    | sapling | 0.062       | 0.107  | 1      | 0.580 |
| ACRU    | sapling | 0.063       | 0.108  | 1      | 0.490 |
| BEAL    | sapling | 0.063       | 0.109  | 1      | 0.540 |
| BELE    | sapling | 0.024       | 0.109  | 1      | 0.540 |
| BEPO    | sapling | 0.063       | 0.109  | 1      | 0.540 |
| FAGR    | sapling | 0.035       | 0.152  | 1      | 0.664 |
| FRAM    | sapling | 0.056       | 0.095  | 1      | 0.319 |
| PIGL    | sapling | 0.033       | 0.087  | 1      | 0.413 |
| PIRE    | sapling | 0.033       | 0.087  | 1      | 0.413 |
| PIST    | sapling | 0.033       | 0.087  | 1      | 0.413 |
| PRSE    | sapling | 0.045       | 0.116  | 1      | 0.370 |
| QURU    | sapling | 0.042       | 0.119  | 1      | 0.413 |
| QUVE    | sapling | 0.042       | 0.119  | 1      | 0.413 |
| TSCA    | sapling | 0.024       | 0.100  | 1      | 0.846 |

**Table A2.** Species biomass equation parameters

| Species | $b_0$  | $b_1$ | $f_{stem}$ | $f_{branch}$ | $f_{leaf}$ | $f_{root}$ | $f_{soil}$ |
|---------|--------|-------|------------|--------------|------------|------------|------------|
| ACPE    | -2.047 | 2.385 | 0.700      | 0.230        | 0.070      | 0.240      | 0.680      |
| ACRU    | -2.047 | 2.385 | 0.700      | 0.230        | 0.070      | 0.240      | 0.680      |
| BEAL    | -1.810 | 2.348 | 0.700      | 0.230        | 0.070      | 0.240      | 0.680      |
| BELE    | -1.810 | 2.348 | 0.700      | 0.230        | 0.070      | 0.240      | 0.680      |
| BEPO    | -2.227 | 2.451 | 0.700      | 0.230        | 0.070      | 0.240      | 0.680      |
| FAGR    | -2.070 | 2.441 | 0.700      | 0.230        | 0.070      | 0.240      | 0.680      |
| FRAM    | -1.838 | 2.352 | 0.700      | 0.230        | 0.070      | 0.240      | 0.680      |
| PIGL    | -2.136 | 2.323 | 0.700      | 0.230        | 0.070      | 0.240      | 0.680      |
| PIRE    | -2.618 | 2.464 | 0.700      | 0.230        | 0.070      | 0.240      | 0.680      |
| PIST    | -2.618 | 2.464 | 0.700      | 0.230        | 0.070      | 0.240      | 0.680      |
| PRSE    | -2.212 | 2.413 | 0.700      | 0.230        | 0.070      | 0.240      | 0.680      |
| QURU    | -2.070 | 2.441 | 0.700      | 0.230        | 0.070      | 0.240      | 0.680      |
| QUVE    | -2.070 | 2.441 | 0.700      | 0.230        | 0.070      | 0.240      | 0.680      |
| TSCA    | -2.348 | 2.388 | 0.700      | 0.230        | 0.070      | 0.240      | 0.680      |



**Table A3.** Biomass carbon fraction parameters

| $f_{stem}$ | $f_{branch}$ | $f_{leaf}$ | $f_{root}$ | $f_{soil}$ |
|------------|--------------|------------|------------|------------|
| 0.500      | 0.500        | 0.500      | 0.500      | 0.143      |

**Table A4.** Species DBH increment parameters

| Species | Type    | $I_{DBH}$ |
|---------|---------|-----------|
| ACPE    | adult   | 0.277     |
| ACRU    | adult   | 0.312     |
| BEAL    | adult   | 0.280     |
| BELE    | adult   | 0.198     |
| BEPO    | adult   | 0.103     |
| FAGR    | adult   | 0.303     |
| FRAM    | adult   | 0.149     |
| PIGL    | adult   | 0.274     |
| PIRE    | adult   | 0.390     |
| PIST    | adult   | 0.277     |
| PRSE    | adult   | 0.120     |
| QURU    | adult   | 0.420     |
| QUVE    | adult   | 0.322     |
| TSCA    | adult   | 0.563     |
| ACPE    | sapling | 0.895     |
| ACRU    | sapling | 0.269     |
| BEAL    | sapling | 0.520     |
| BELE    | sapling | 0.201     |
| BEPO    | sapling | 0.300     |
| FAGR    | sapling | 0.530     |
| FRAM    | sapling | 0.500     |
| PIGL    | sapling | 0.353     |
| PIRE    | sapling | 0.350     |
| PIST    | sapling | 0.350     |
| PRSE    | sapling | 0.200     |
| QURU    | sapling | 0.098     |
| QUVE    | sapling | 0.100     |
| TSCA    | sapling | 0.509     |

**Table A5.** Species mortality parameters

| Species | Type    | $p_{mortality}$ |
|---------|---------|-----------------|
| ACPE    | adult   | 0.115           |
| ACRU    | adult   | 0.030           |
| BEAL    | adult   | 0.035           |
| BELE    | adult   | 0.009           |
| BEPO    | adult   | 0.032           |
| FAGR    | adult   | 0.015           |
| FRAM    | adult   | 0.004           |
| PIGL    | adult   | 0.074           |
| PIRE    | adult   | 0.023           |
| PIST    | adult   | 0.010           |
| PRSE    | adult   | 0.009           |
| QURU    | adult   | 0.007           |
| QUVE    | adult   | 0.001           |
| TSCA    | adult   | 0.022           |
| ACPE    | sapling | 0.001           |
| ACRU    | sapling | 0.873           |
| BEAL    | sapling | 0.001           |
| BELE    | sapling | 0.667           |
| BEPO    | sapling | 0.001           |
| FAGR    | sapling | 0.354           |
| FRAM    | sapling | 0.001           |
| PIGL    | sapling | 0.001           |
| PIRE    | sapling | 0.001           |
| PIST    | sapling | 0.001           |
| PRSE    | sapling | 0.001           |
| QURU    | sapling | 0.001           |
| QUVE    | sapling | 0.001           |
| TSCA    | sapling | 0.821           |

**Table A6.** Species fecundity parameters

| Species | Fecundity |
|---------|-----------|
| ACPE    | 2         |
| ACRU    | 29        |
| BEAL    | 16        |
| BELE    | 8         |
| BEPO    | 2         |
| FAGR    | 11        |
| FRAM    | 5         |
| PIGL    | 3         |
| PIRE    | 3         |
| PIST    | 11        |
| PRSE    | 8         |
| QURU    | 29        |
| QUVE    | 9         |
| TSCA    | 17        |

**Table A7.** Species C:N ratio parameters

| Species | $CN_{stem}$ | $CN_{branch}$ | $CN_{leaf}$ | $CN_{litter}$ | $CN_{root}$ | $CN_{soil}$ |
|---------|-------------|---------------|-------------|---------------|-------------|-------------|
| ACPE    | 548.590     | 71.460        | 30.460      | 58.800        | 68.548      | 23.087      |
| ACRU    | 548.590     | 71.460        | 30.460      | 58.800        | 68.548      | 23.087      |
| BEAL    | 548.590     | 71.460        | 22.420      | 58.800        | 68.548      | 23.087      |
| BELE    | 548.590     | 71.460        | 21.200      | 58.800        | 68.548      | 23.087      |
| BEPO    | 548.590     | 71.460        | 21.560      | 58.800        | 68.548      | 23.087      |
| FAGR    | 548.590     | 71.460        | 22.420      | 58.800        | 68.548      | 23.087      |
| FRAM    | 548.590     | 71.460        | 21.910      | 58.800        | 68.548      | 23.087      |
| PIGL    | 548.590     | 71.460        | 38          | 58.800        | 68.548      | 23.087      |
| PIRE    | 548.590     | 71.460        | 33          | 58.800        | 68.548      | 23.087      |
| PIST    | 548.590     | 71.460        | 38          | 58.800        | 68.548      | 23.087      |
| PRSE    | 548.590     | 71.460        | 21.500      | 58.800        | 68.548      | 23.087      |
| QURU    | 548.590     | 71.460        | 21.920      | 58.800        | 68.548      | 23.087      |
| QUVE    | 548.590     | 71.460        | 21.920      | 58.800        | 68.548      | 23.087      |
| TSCA    | 548.590     | 71.460        | 42.520      | 58.800        | 68.548      | 23.087      |

879 Appendix C.1.2. LANDIS-II NECN

**Table A8.** NECN adjustment parameters

| Parameter              | Value  |
|------------------------|--------|
| $p_{est}$ modifier     | 0.1    |
| $N_{mineral}$ initial  | 3.0    |
| $Fuels_{fine}$ initial | 0.1    |
| $N_{atmos}$ slope      | 0.007  |
| $N_{atmos}$ intercept  | 0.011  |
| $Latitude_{deg}$       | 43.3   |
| $r_{denitrification}$  | 0.001  |
| $r_{decay}$ surface    | 0.65   |
| $r_{decay}$ SOM1       | 1.0    |
| $r_{decay}$ SOM2       | 0.125  |
| $r_{decay}$ SOM3       | 0.0002 |

**Table A9.** NECN maximum LAI parameters

| $Class_{shade}$ | $LAI_{max}$ |
|-----------------|-------------|
| 1               | 1           |
| 2               | 2.5         |
| 3               | 3.5         |
| 4               | 6           |
| 5               | 8           |

**Table A10.** NECN light establishment parameters

| $Class_{shade}$ | $Shade_0$ | $Shade_1$ | $Shade_2$ | $Shade_3$ | $Shade_4$ | $Shade_5$ |
|-----------------|-----------|-----------|-----------|-----------|-----------|-----------|
| 1               | 1         | 1         | 0.25      | 0.1       | 0         | 0         |
| 2               | 0.5       | 0.5       | 1         | 0.25      | 0.1       | 0         |
| 3               | 0.1       | 0.5       | 1         | 1         | 0.5       | 0.1       |
| 4               | 0.1       | 0.25      | 0.5       | 0.5       | 1         | 0.25      |
| 5               | 0         | 0.1       | 0.25      | 0.25      | 0.5       | 1         |

**Table A11.** NECN species parameters

| Species | PFT | $N_{fix}$ | $GDD_{min}$ | $GDD_{max}$ | $T_{min}$ | $D_{max}$ | $Long_{leaf}$ | $R_{epi}$ | $L_{leaf}$ | $L_{root_l}$ | $L_{wood}$ | $L_{root_c}$ | $CN_{leaf}$ | $CN_{root_l}$ | $CN_{wood}$ | $CN_{root_c}$ | $CN_{litter}$ | $ANPP_{max}$ | $B_{max}$ |
|---------|-----|-----------|-------------|-------------|-----------|-----------|---------------|-----------|------------|--------------|------------|--------------|-------------|---------------|-------------|---------------|---------------|--------------|-----------|
| ACRU    | 3   | N         | 1260        | 6600        | -18       | 0.23      | 1             | N         | 0.183      | 0.334        | 0.125      | 0.312        | 28.20       | 26            | 565         | 50            | 55            | 440          | 25000     |
| QURU    | 2   | N         | 1100        | 4571        | -17       | 0.2025    | 1             | N         | 0.249      | 0.334        | 0.225      | 0.303        | 18.50       | 58            | 398         | 113           | 32            | 380          | 25000     |

**Table A12.** Functional group parameters

| PFT            | Index | $T_{mean}$ | $T_{max}$ | $T_{shape}$ | $T_{shape}$ | $f_{cf}$ | $BTOLAI$ | $kLAI$ | $LAI_{max}$ | $PPRPTS_2$ | $PPRPTS_3$ | $r_{decayw}$ | $m_{wood}$ | $m_{shape}$ | $drop_{month}$ | $f_{rootc}$ | $f_{rootf}$ |
|----------------|-------|------------|-----------|-------------|-------------|----------|----------|--------|-------------|------------|------------|--------------|------------|-------------|----------------|-------------|-------------|
| Oaks           | 2     | 25         | 40        | 1.5         | 2.5         | 0.6      | -0.9     | 10000  | 9           | 0.1        | 0.8        | 0.5          | 0.0006     | 15          | 9              | 0.2         | 0.5         |
| NorthHardwoods | 3     | 25         | 40        | 1.5         | 2.5         | 0.6      | -0.9     | 7000   | 10          | 1.5        | 0.96       | 0.7          | 0.0006     | 15          | 9              | 0.2         | 0.5         |

**Table A13.** Fire reduction parameters; inactive

| $Class_{severity}$ | $Reduction_{wood}$ | $Reduction_{litter}$ | $Reduction_{SOM}$ |
|--------------------|--------------------|----------------------|-------------------|
| 1                  | 0.0                | 0.5                  | 1.0               |
| 2                  | 0.05               | 0.75                 | 1.0               |
| 3                  | 0.2                | 1.0                  | 1.0               |
| 4                  | 0.5                | 1.0                  | 1.0               |
| 5                  | 0.8                | 1.0                  | 1.0               |

**Table A14.** Harvest reduction parameters; inactive

| Class        | $Reduction_{wood}$ | $Reduction_{litter}$ | $Reduction_{SOM}$ | $Removal_{leaf}$ | $Removal_{wood}$ |
|--------------|--------------------|----------------------|-------------------|------------------|------------------|
| HandThinning | 0.05               | 1.0                  | 1.0               | 1.0              | 1.0              |
| MechThinning | 0.05               | 1.0                  | 1.0               | 0.85             | 1.0              |

**Table A15.** Species parameters; only ACRU and QURU were simulated

| Species | Longevity | Maturity | $T_{shade}$ | $T_{fire}$ | $D_{eff}$ | $D_{max}$ | $p_{veg}$ | $S_{min}$ | $S_{max}$ | $R_{fire}$ |
|---------|-----------|----------|-------------|------------|-----------|-----------|-----------|-----------|-----------|------------|
| ABBA    | 200       | 25       | 5           | 1          | 30        | 160       | 0         | 0         | 0         | none       |
| ACRU    | 235       | 5        | 4           | 1          | 100       | 200       | 0.75      | 0         | 150       | none       |
| ACSA    | 300       | 40       | 5           | 1          | 100       | 200       | 0.1       | 0         | 60        | none       |
| BEAL    | 300       | 40       | 3           | 2          | 100       | 400       | 0.1       | 0         | 180       | none       |
| BELE    | 250       | 40       | 4           | 2          | 100       | 400       | 0.1       | 0         | 0         | none       |
| BEPA    | 150       | 40       | 4           | 2          | 100       | 600       | 0.75      | 0         | 150       | none       |
| BEPO    | 150       | 40       | 4           | 2          | 100       | 400       | 0.1       | 0         | 0         | none       |
| CAGL    | 200       | 30       | 3           | 2          | 50        | 100       | 0.25      | 0         | 200       | resprout   |
| FAGR    | 350       | 10       | 5           | 1          | 30        | 300       | 0.4       | 10        | 200       | resprout   |
| FRAM    | 300       | 30       | 2           | 1          | 70        | 140       | 0.1       | 0         | 70        | none       |
| FRNI    | 150       | 30       | 4           | 2          | 200       | 2000      | 0.8       | 10        | 140       | resprout   |
| LALA    | 180       | 35       | 2           | 2          | 100       | 400       | 0.2       | 0         | 0         | none       |
| OSVI    | 110       | 25       | 4           | 2          | 100       | 200       | 0.15      | 0         | 100       | resprout   |
| PIGL    | 300       | 25       | 3           | 2          | 30        | 200       | 0         | 0         | 0         | none       |
| PIMA    | 215       | 30       | 3           | 3          | 79        | 158       | 0         | 0         | 0         | none       |
| PIRU    | 350       | 15       | 5           | 2          | 80        | 125       | 0         | 0         | 0         | none       |
| PIRE    | 250       | 15       | 2           | 4          | 100       | 275       | 0.1       | 0         | 20        | none       |
| PIRI    | 200       | 10       | 2           | 4          | 90        | 150       | 0.5       | 10        | 100       | resprout   |
| PIST    | 400       | 25       | 3           | 3          | 60        | 210       | 0         | 0         | 0         | none       |
| POBA    | 150       | 10       | 1           | 2          | 100       | 200       | 0.8       | 10        | 80        | resprout   |
| POGR    | 110       | 20       | 1           | 1          | 1000      | 5000      | 0.9       | 0         | 100       | resprout   |
| POTR    | 110       | 20       | 1           | 1          | 1000      | 5000      | 0.9       | 0         | 100       | resprout   |
| PRSE    | 200       | 10       | 2           | 3          | 100       | 200       | 0.5       | 20        | 90        | resprout   |
| QUAL    | 400       | 25       | 3           | 2          | 30        | 800       | 0.1       | 20        | 200       | resprout   |
| QUCO    | 150       | 20       | 2           | 3          | 50        | 100       | 0.5       | 20        | 100       | resprout   |
| QUPR    | 300       | 20       | 3           | 3          | 50        | 150       | 0.5       | 10        | 200       | resprout   |
| QURU    | 250       | 30       | 3           | 2          | 30        | 800       | 0.5       | 20        | 200       | resprout   |
| QUVE    | 120       | 20       | 3           | 2          | 70        | 150       | 0.1       | 20        | 90        | resprout   |
| THOC    | 800       | 30       | 2           | 1          | 45        | 100       | 0.5       | 0         | 200       | none       |
| TIAM    | 250       | 15       | 4           | 1          | 75        | 150       | 0.8       | 10        | 240       | resprout   |
| TSCA    | 500       | 20       | 5           | 2          | 30        | 100       | 0         | 0         | 0         | none       |
| ULAM    | 85        | 20       | 4           | 2          | 90        | 400       | 0.3       | 5         | 70        | resprout   |

880 *Appendix C.2. JERC-RD*

881 *Appendix C.2.1. PPA-SiBGC*

**Table A16.** Species crown allometry parameters

| Species | Type    | $h_{coeff}$ | $cr1$ | $cr2$ | $cd$  |
|---------|---------|-------------|-------|-------|-------|
| PIPA    | adult   | 0.033       | 0.087 | 1     | 0.413 |
| QUIN    | adult   | 0.042       | 0.119 | 1     | 0.413 |
| QUNI    | adult   | 0.042       | 0.119 | 1     | 0.413 |
| QUVI    | adult   | 0.042       | 0.119 | 1     | 0.413 |
| PIPA    | sapling | 0.033       | 0.087 | 1     | 0.413 |
| QUIN    | sapling | 0.042       | 0.119 | 1     | 0.413 |
| QUNI    | sapling | 0.042       | 0.119 | 1     | 0.413 |
| QUVI    | sapling | 0.042       | 0.119 | 1     | 0.413 |

**Table A17.** Species biomass equation parameters

| Species | $b_0$  | $b_1$ | $f_{stem}$ | $f_{branch}$ | $f_{leaf}$ | $f_{root}$ | $f_{soil}$ |
|---------|--------|-------|------------|--------------|------------|------------|------------|
| PIPA    | -3.051 | 2.647 | 0.700      | 0.230        | 0.070      | 0.240      | 0.680      |
| QUIN    | -2.070 | 2.441 | 0.700      | 0.230        | 0.070      | 0.240      | 0.680      |
| QUNI    | -2.070 | 2.441 | 0.700      | 0.230        | 0.070      | 0.240      | 0.680      |
| QUVI    | -2.070 | 2.441 | 0.700      | 0.230        | 0.070      | 0.240      | 0.680      |

**Table A18.** Biomass carbon fraction parameters

| $f_{stem}$ | $f_{branch}$ | $f_{leaf}$ | $f_{root}$ | $f_{soil}$ |
|------------|--------------|------------|------------|------------|
| 0.500      | 0.500        | 0.500      | 0.500      | 0.143      |

**Table A19.** Species DBH increment parameters

| Species | Type    | $I_{DBH}$ |
|---------|---------|-----------|
| PIPA    | adult   | 0.261     |
| QUIN    | adult   | 0.119     |
| QUNI    | adult   | 0.994     |
| QUVI    | adult   | 0.276     |
| PIPA    | sapling | 0.197     |
| QUIN    | sapling | 0.100     |
| QUNI    | sapling | 0.440     |
| QUVI    | sapling | 0.271     |

**Table A20.** Species mortality parameters

| Species | Type    | $p_{mortality}$ |
|---------|---------|-----------------|
| PIPA    | adult   | 0.001           |
| QUIN    | adult   | 0.001           |
| QUNI    | adult   | 0.001           |
| QUVI    | adult   | 0.001           |
| PIPA    | sapling | 0.174           |
| QUIN    | sapling | 0.333           |
| QUNI    | sapling | 0.143           |
| QUVI    | sapling | 0.111           |

**Table A21.** Species fecundity parameters

| Species | Fecundity |
|---------|-----------|
| PIPA    | 2         |
| QUIN    | 0         |
| QUNI    | 0         |
| QUVI    | 0         |



**Table A22.** Species C:N ratio parameters

| Species | $CN_{stem}$ | $CN_{branch}$ | $CN_{leaf}$ | $CN_{litter}$ | $CN_{root}$ | $CN_{soil}$ |
|---------|-------------|---------------|-------------|---------------|-------------|-------------|
| PIPA    | 133.721     | 133.721       | 255.103     | 255.103       | 133.721     | 23.087      |
| QUIN    | 96.370      | 96.370        | 85.259      | 85.259        | 96.370      | 23.087      |
| QUNI    | 96.370      | 96.370        | 85.259      | 85.259        | 96.370      | 23.087      |
| QUVI    | 96.370      | 96.370        | 85.259      | 85.259        | 96.370      | 23.087      |

882 Appendix C.2.2. LANDIS-II NECN

**Table A23.** NECN adjustment parameters

| Parameter              | Value     |
|------------------------|-----------|
| $p_{est}$ modifier     | 0.4       |
| $N_{mineral}$ initial  | 0.5       |
| $Fuels_{fine}$ initial | 0.1       |
| $N_{atmos}$ slope      | 0.004     |
| $N_{atmos}$ intercept  | 0.017     |
| $Latitude_{deg}$       | 31.220731 |
| $r_{denitrification}$  | 0.02      |
| $r_{decay}$ surface    | 0.70      |
| $r_{decay}$ SOM1       | 0.81      |
| $r_{decay}$ SOM2       | 0.05      |
| $r_{decay}$ SOM3       | 0.00006   |

**Table A24.** NECN maximum LAI parameters

| $Class_{shade}$ | $LAI_{max}$ |
|-----------------|-------------|
| 1               | 1           |
| 2               | 2.5         |
| 3               | 3.5         |
| 4               | 6           |
| 5               | 8           |

**Table A25.** NECN light establishment parameters

| $Class_{shade}$ | $Shade_0$ | $Shade_1$ | $Shade_2$ | $Shade_3$ | $Shade_4$ | $Shade_5$ |
|-----------------|-----------|-----------|-----------|-----------|-----------|-----------|
| 1               | 1         | 1         | 0.25      | 0.1       | 0         | 0         |
| 2               | 0.5       | 0.5       | 1         | 0.25      | 0.1       | 0         |
| 3               | 0.1       | 1         | 1         | 1         | 0.5       | 0.1       |
| 4               | 0.1       | 0.25      | 0.5       | 0.5       | 1         | 0.25      |
| 5               | 0         | 0.1       | 0.25      | 0.25      | 0.5       | 1         |

**Table A26.** NECN species parameters

| Species | PFT | $N_{fix}$ | $GDD_{min}$ | $GDD_{max}$ | $T_{min}$ | $D_{max}$ | $Long_{leaf}$ | $R_{epi}$ | $L_{leaf}$ | $L_{root}$ | $L_{wood}$ | $L_{root}$ | $CN_{leaf}$ | $CN_{root}$ | $CN_{wood}$ | $CN_{root}$ | $CN_{litter}$ | $ANPP_{max}$ | $B_{max}$ |
|---------|-----|-----------|-------------|-------------|-----------|-----------|---------------|-----------|------------|------------|------------|------------|-------------|-------------|-------------|-------------|---------------|--------------|-----------|
| QUIN    | 2   | N         | 3915        | 7000        | 1         | 0.423     | 1             | N         | 0.293      | 0.23       | 0.23       | 0.35       | 24          | 48          | 500         | 333         | 55            | 250          | 15000     |
| QULA    | 2   | N         | 3915        | 7000        | 1         | 0.423     | 1             | N         | 0.293      | 0.23       | 0.23       | 0.35       | 24          | 48          | 500         | 333         | 55            | 250          | 15000     |
| PIPA    | 1   | N         | 3915        | 7000        | 1         | 0.423     | 2             | N         | 0.2        | 0.2        | 0.35       | 0.35       | 50          | 50          | 380         | 170         | 100           | 500          | 15000     |

**Table A27.** Functional group parameters

| PFT  | Index | $T_{mean}$ | $T_{max}$ | $T_{shape}$ | $T_{shape}$ | $f_{C_f}$ | $BTOLAI$ | $kLAI$ | $LAI_{max}$ | $PPRPTS_2$ | $PPRPTS_3$ | $r_{decay}$ | $m_{wood}$ | $m_{shape}$ | $month_{drop}$ | $f_{root}$ | $f_{root}$ |
|------|-------|------------|-----------|-------------|-------------|-----------|----------|--------|-------------|------------|------------|-------------|------------|-------------|----------------|------------|------------|
| Pine | 1     | 28         | 45        | 3.0         | 2.5         | 0.37      | -0.9     | 2000   | 10          | 1          | 0.8        | 0.6         | 0.001      | 15          | 9              | 0.31       | 0.56       |
| Oaks | 2     | 27         | 45        | 2.2         | 2.5         | 0.5       | -0.9     | 2000   | 20          | 0.1        | 0.75       | 0.6         | 0.001      | 15          | 9              | 0.21       | 0.59       |

**Table A28.** Fire reduction parameters; inactive

| $Class_{severity}$ | $Reduction_{wood}$ | $Reduction_{litter}$ | $Reduction_{SOM}$ |
|--------------------|--------------------|----------------------|-------------------|
| 1                  | 0.0                | 0.5                  | 1.0               |
| 2                  | 0.05               | 0.75                 | 1.0               |
| 3                  | 0.2                | 1.0                  | 1.0               |
| 4                  | 0.5                | 1.0                  | 1.0               |
| 5                  | 0.8                | 1.0                  | 1.0               |

**Table A29.** Harvest reduction parameters; inactive

| $Class_{severity}$ | $Reduction_{wood}$ | $Reduction_{litter}$ | $Reduction_{SOM}$ | $Removal_{leaf}$ | $Removal_{wood}$ |
|--------------------|--------------------|----------------------|-------------------|------------------|------------------|
| HandThinning       | 0.05               | 1.0                  | 1.0               | 1.0              | 1.0              |
| MechThinning       | 0.05               | 1.0                  | 1.0               | 0.85             | 1.0              |

**Table A30.** Species parameters

| Species | Longevity | Maturity | $T_{shade}$ | $T_{fire}$ | $D_{eff}$ | $D_{max}$ | $p_{veg}$ | $S_{min}$ | $S_{max}$ | $R_{fire}$ |
|---------|-----------|----------|-------------|------------|-----------|-----------|-----------|-----------|-----------|------------|
| QUIN    | 150       | 10       | 4           | 5          | 50        | 3000      | 0.75      | 5         | 40        | resprout   |
| QULA    | 150       | 20       | 4           | 3          | 50        | 3000      | 0.75      | 5         | 40        | resprout   |
| PIPA    | 400       | 20       | 1           | 5          | 20        | 200       | 0.0       | 0         | 5         | none       |
